# Supplementary material for: Thiolactones and Δ8,9-Pregnene Steroids from the Marine-Derived Fungus Meira sp. 1210CH-42 and Their α-Glucosidase Inhibitory Activity
Source: MDPI journal article supplement (doi:10.3390/md21040246), 2023-04-16
Supplement: s1 [file s1]

*Supporting Information*

**Thiolactones and  $\Delta^{8,9}$ -Pregnene Steroids from the Marine-Derived Fungus *Meira* sp. 1210CH-42 and Their  $\alpha$ -Glucosidase Inhibitory Activity**

**\*Corresponding Author**

Hee Jae Shin

E-mail: shinhj@kiost.ac.kr; Tel.: +82-51-664-3341; Fax: +82-51-664-3340

## Contents

|                                                                                                |    |
|------------------------------------------------------------------------------------------------|----|
| Figure S1. $^1\text{H}$ NMR spectrum of <b>1</b> in $\text{CD}_3\text{OD}$ (600 MHz).....      | 4  |
| Figure S2. $^{13}\text{C}$ NMR spectrum of <b>1</b> in $\text{CD}_3\text{OD}$ (150 MHz). ....  | 4  |
| Figure S3. HSQC spectrum of <b>1</b> in $\text{CD}_3\text{OD}$ .....                           | 5  |
| Figure S4. COSY spectrum of <b>1</b> in $\text{CD}_3\text{OD}$ . ....                          | 5  |
| Figure S5. HMBC spectrum of <b>1</b> in $\text{CD}_3\text{OD}$ .....                           | 6  |
| Figure S6. Selective 1D NOESY spectrum of <b>1</b> in $\text{CD}_3\text{OD}$ . ....            | 7  |
| Figure S7. HR-ESIMS spectrum of <b>1</b> .....                                                 | 8  |
| Figure S8. $^1\text{H}$ NMR spectrum of <b>2</b> in $\text{CD}_3\text{OD}$ (600 MHz). ....     | 9  |
| Figure S9. $^{13}\text{C}$ NMR spectrum of <b>2</b> in $\text{CD}_3\text{OD}$ (150 MHz). ....  | 9  |
| Figure S10. HSQC spectrum of <b>2</b> in $\text{CD}_3\text{OD}$ .....                          | 10 |
| Figure S11. COSY spectrum of <b>2</b> in $\text{CD}_3\text{OD}$ . ....                         | 10 |
| Figure S12. HMBC spectrum of <b>2</b> in $\text{CD}_3\text{OD}$ .....                          | 11 |
| Figure S13. Selective 1D NOESY spectrum of <b>2</b> in $\text{CD}_3\text{OD}$ . ....           | 12 |
| Figure S14. HR-ESIMS spectrum of <b>2</b> .....                                                | 13 |
| Figure S15. 1D NOESY spectrum of the reported compound. ....                                   | 14 |
| Figure S16. 1D NOESY correlations of the reported compound. ....                               | 14 |
| Figure S17. $^1\text{H}$ NMR spectrum of <b>3</b> in $\text{CD}_3\text{OD}$ (600 MHz). ....    | 15 |
| Figure S18. $^{13}\text{C}$ NMR spectrum of <b>3</b> in $\text{CD}_3\text{OD}$ (150 MHz). .... | 15 |
| Figure S19. HSQC spectrum of <b>3</b> in $\text{CD}_3\text{OD}$ .....                          | 16 |
| Figure S20. HR-ESIMS spectrum of <b>3</b> .....                                                | 17 |
| Figure S21. $^1\text{H}$ NMR spectrum of <b>4</b> in $\text{CD}_3\text{OD}$ (600 MHz). ....    | 18 |
| Figure S22. $^{13}\text{C}$ NMR spectrum of <b>4</b> in $\text{CD}_3\text{OD}$ (150 MHz). .... | 18 |

|                                                                                                                                                  |    |
|--------------------------------------------------------------------------------------------------------------------------------------------------|----|
| Figure S23. HSQC spectrum of <b>4</b> in CD <sub>3</sub> OD.....                                                                                 | 19 |
| Figure S24. COSY spectrum of <b>4</b> in CD <sub>3</sub> OD. ....                                                                                | 19 |
| Figure S25. HMBC spectrum of <b>4</b> in CD <sub>3</sub> OD.....                                                                                 | 20 |
| Figure S26. ROESY spectrum of <b>4</b> in CD <sub>3</sub> OD. ....                                                                               | 20 |
| Figure S27. Selective 1D NOESY spectrum of <b>4</b> in CD <sub>3</sub> OD. ....                                                                  | 21 |
| Figure S28. HR-ESIMS spectrum of <b>4</b> .....                                                                                                  | 22 |
| Figure S29. Comparison of <sup>1</sup> H NMR spectra of <b>4</b> in pyridine- <i>d</i> <sub>5</sub> and in CD <sub>3</sub> OD.....               | 23 |
| Figure S30. <sup>1</sup> H NMR spectrum of <b>5</b> in CD <sub>3</sub> OD (600 MHz) .....                                                        | 24 |
| Figure S31. <sup>13</sup> C NMR spectrum of <b>5</b> in CD <sub>3</sub> OD (150 MHz). ....                                                       | 24 |
| Figure S32. HSQC spectrum of <b>5</b> in CD <sub>3</sub> OD.....                                                                                 | 25 |
| Figure S33. COSY spectrum of <b>5</b> in CD <sub>3</sub> OD. ....                                                                                | 25 |
| Figure S34. HMBC spectrum of <b>5</b> in CD <sub>3</sub> OD.....                                                                                 | 26 |
| Figure S35. Comparison of <sup>1</sup> H NMR spectra between natural <b>5</b> and semisynthetic <b>5</b> in CD <sub>3</sub> OD<br>(600 MHz)..... | 27 |
| Figure S36. HSQC spectrum of semisynthetic <b>5</b> in CD <sub>3</sub> OD. ....                                                                  | 28 |
| Figure S37. HMBC spectrum of semisynthetic <b>5</b> in CD <sub>3</sub> OD. ....                                                                  | 28 |
| Figure S38. HR-ESIMS spectrum of semisynthetic <b>5</b> .....                                                                                    | 29 |
| Table S1. <sup>1</sup> H and <sup>13</sup> C NMR data of <b>1</b> , <b>2</b> , and the reported compound in CDCl <sub>3</sub> .....              | 14 |



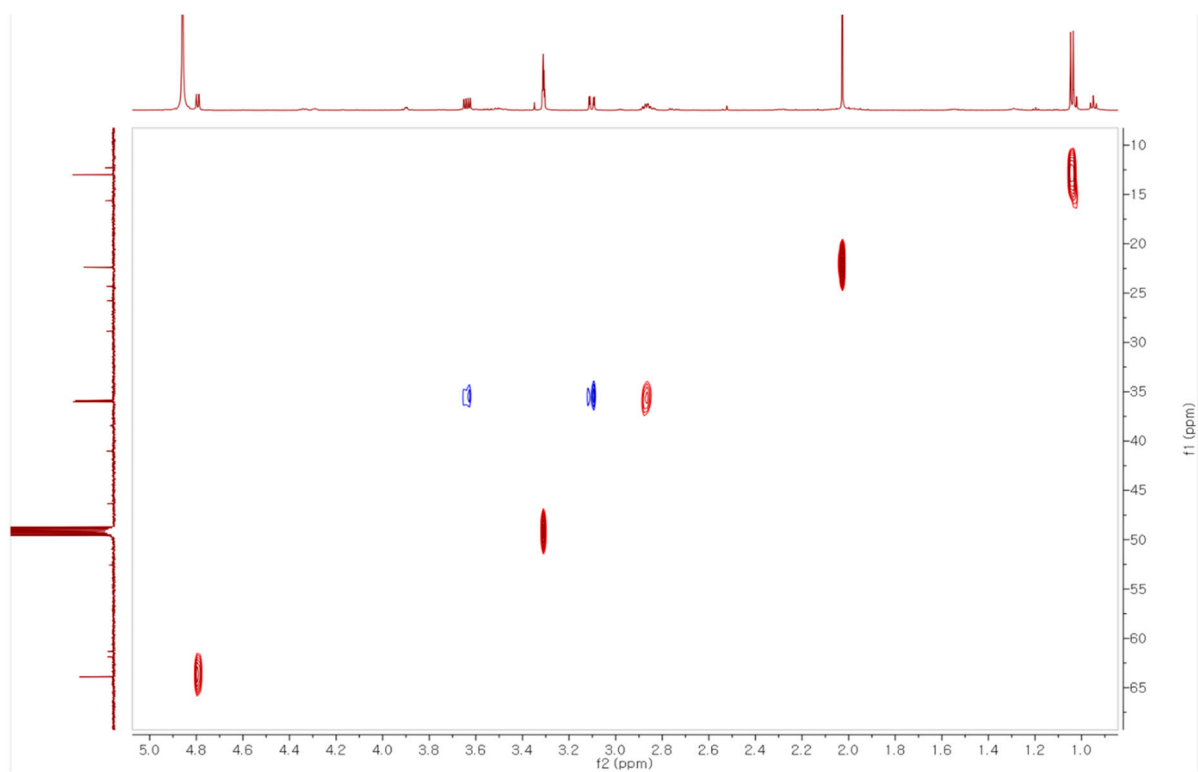

Figure S3. HSQC spectrum of **1** in CD<sub>3</sub>OD.

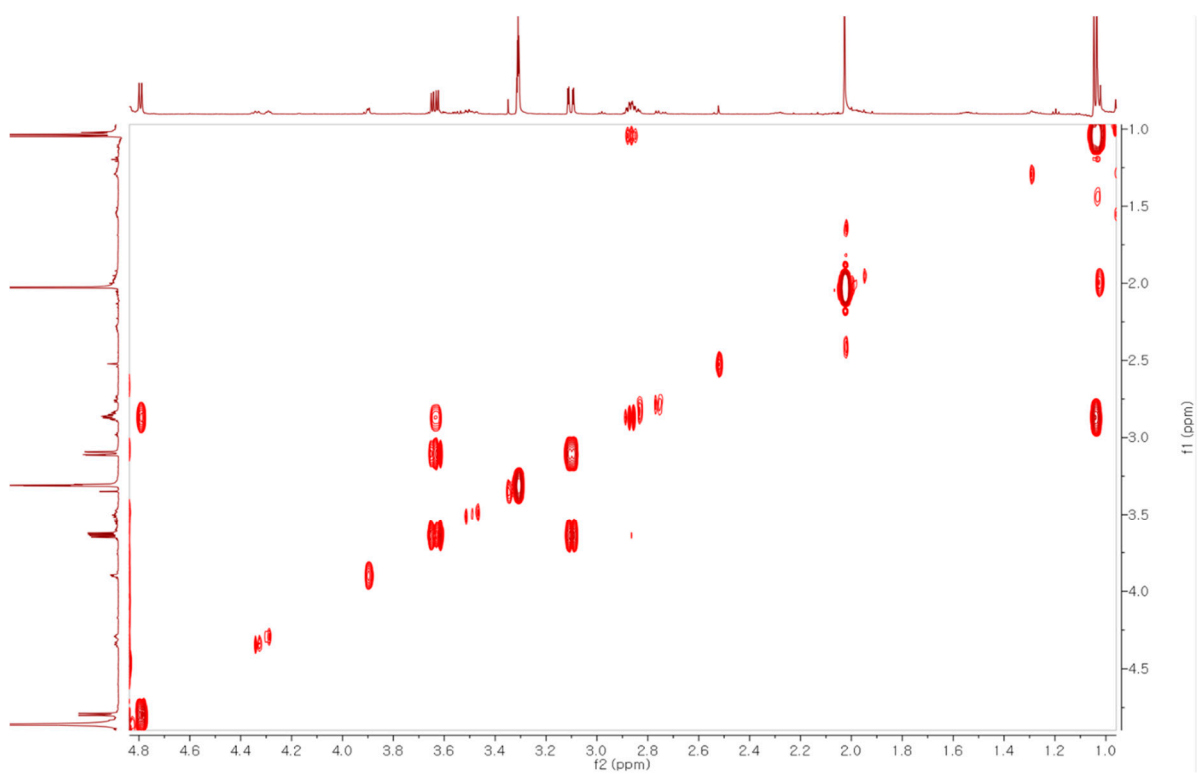

Figure S4. COSY spectrum of **1** in CD<sub>3</sub>OD.

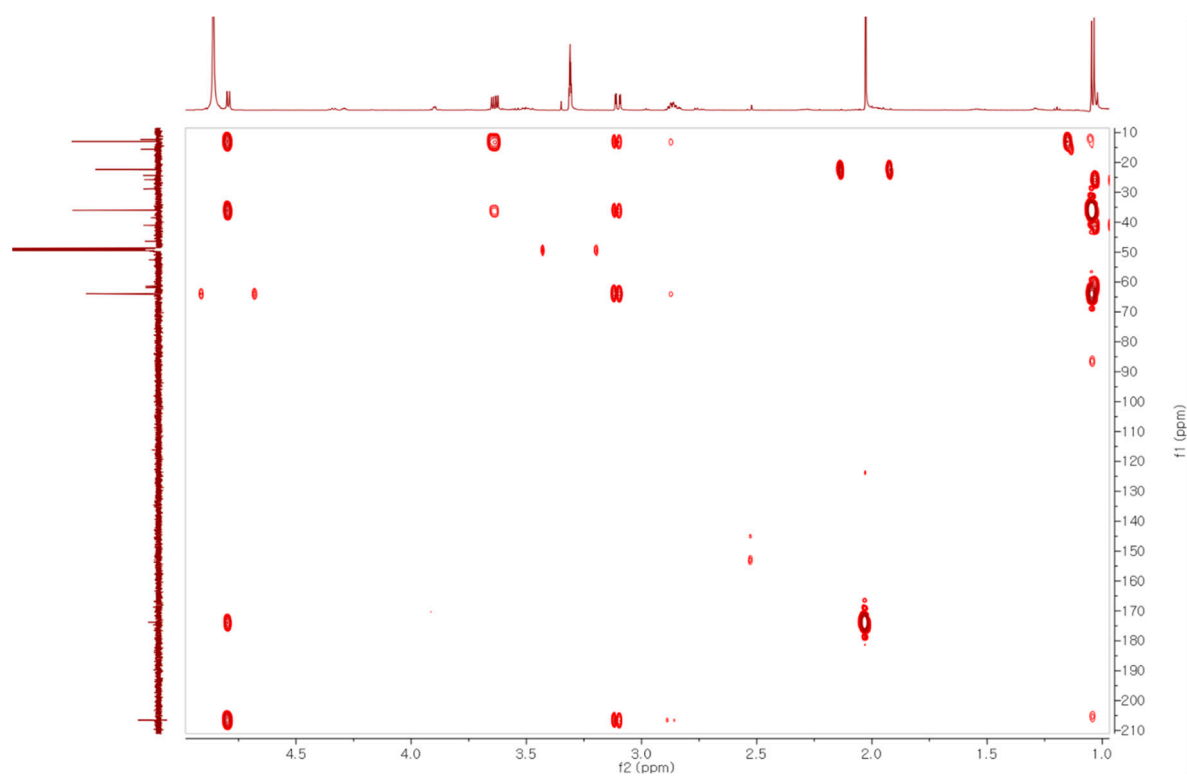

Figure S5. HMBC spectrum of **1** in CD<sub>3</sub>OD.

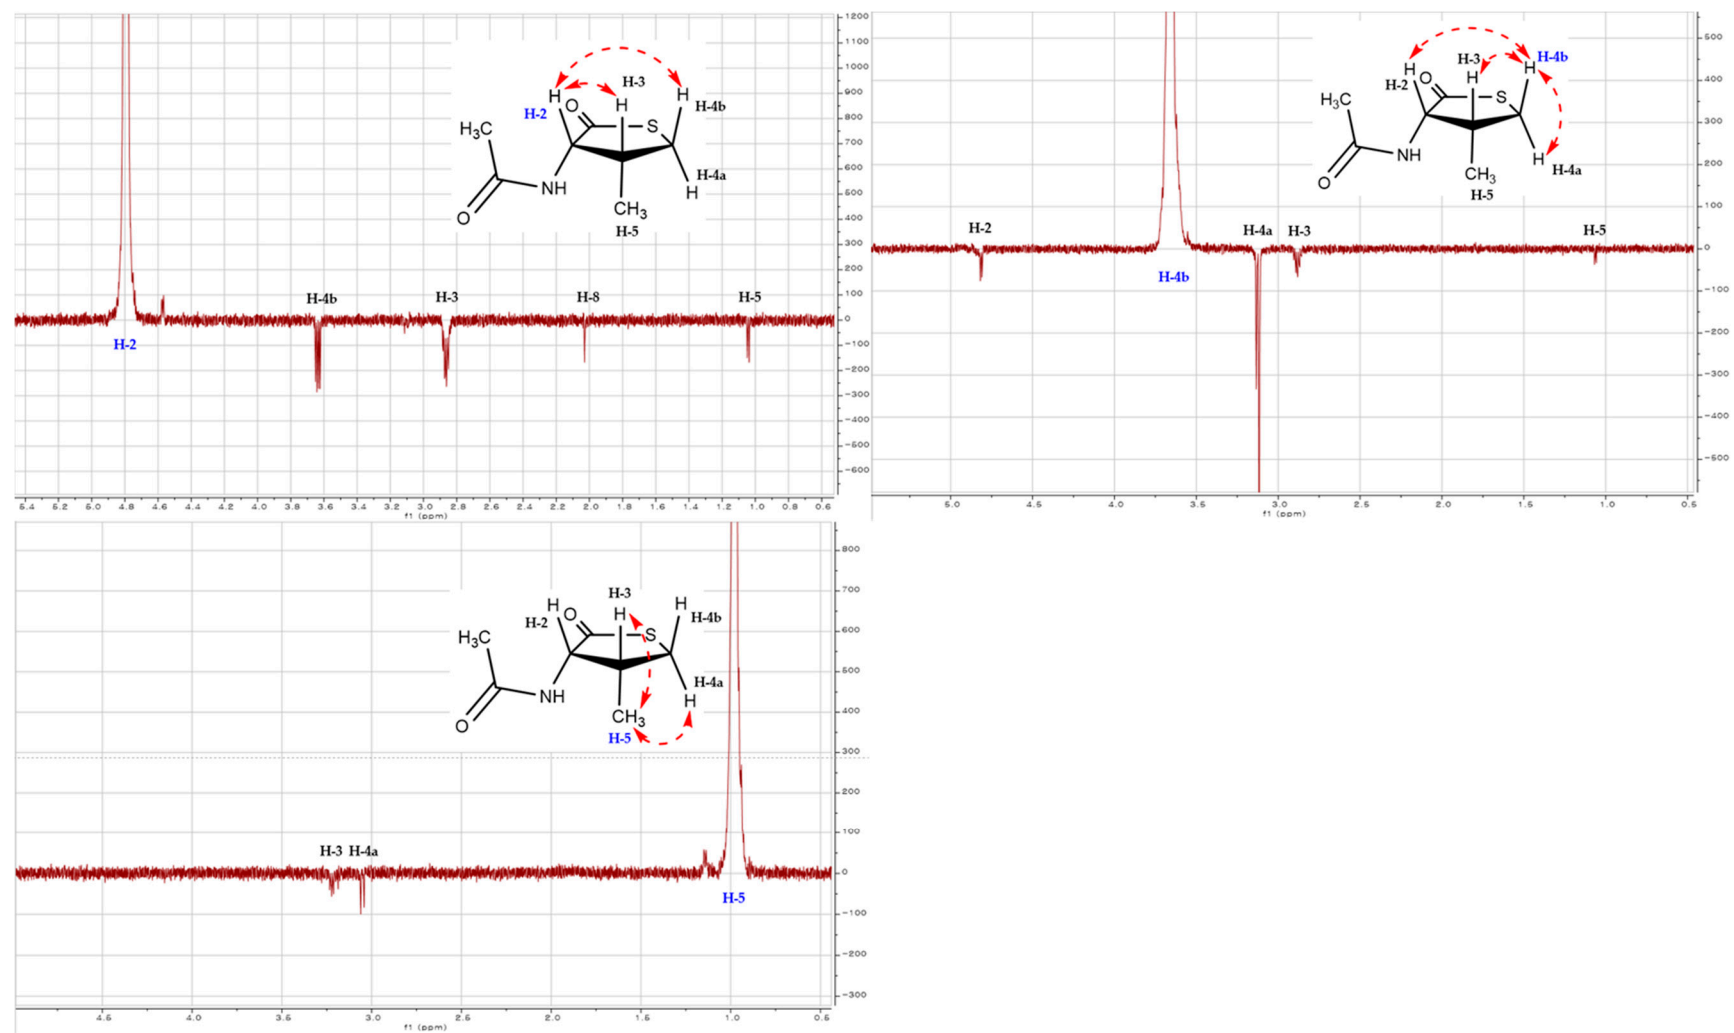

Figure S6. Selective 1D NOESY spectrum of 1 in CD<sub>3</sub>OD.

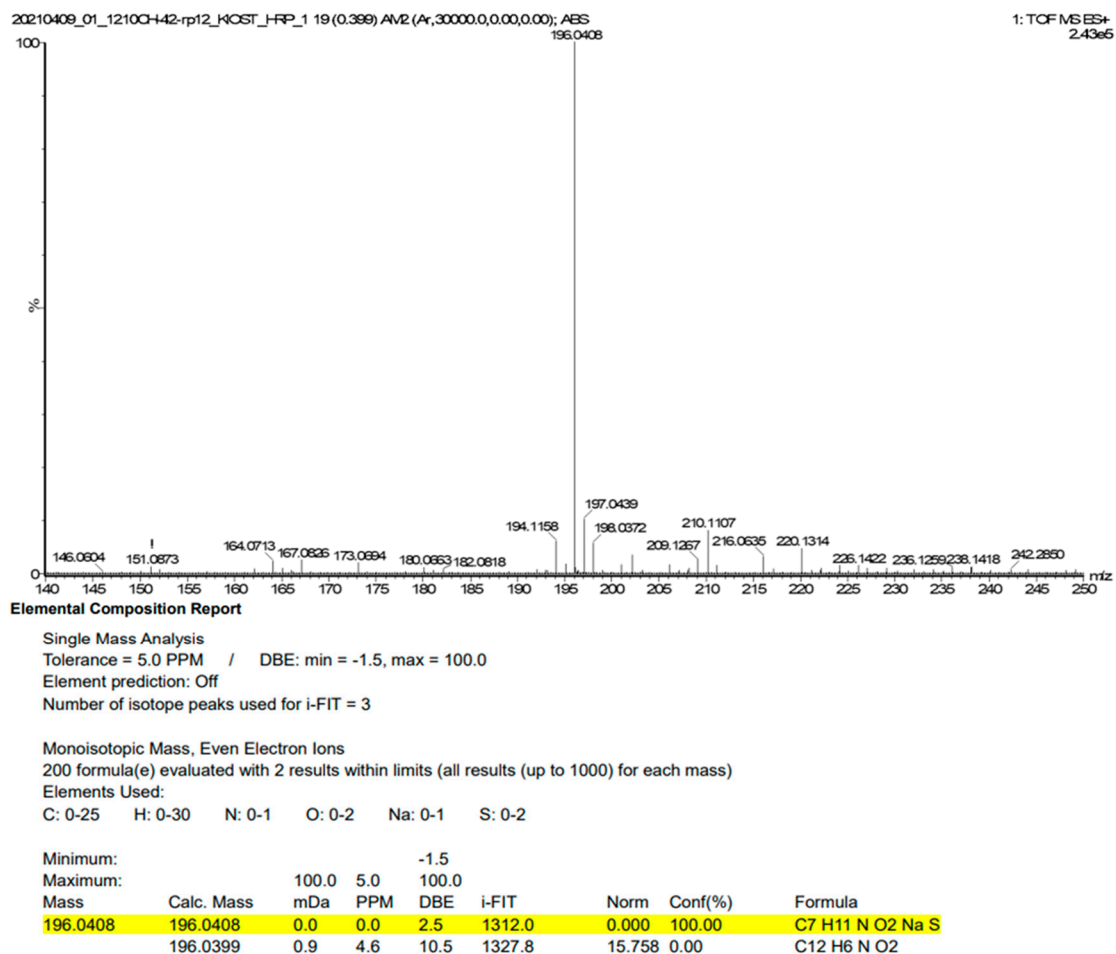

Figure S7. HR-ESIMS spectrum of **1**.



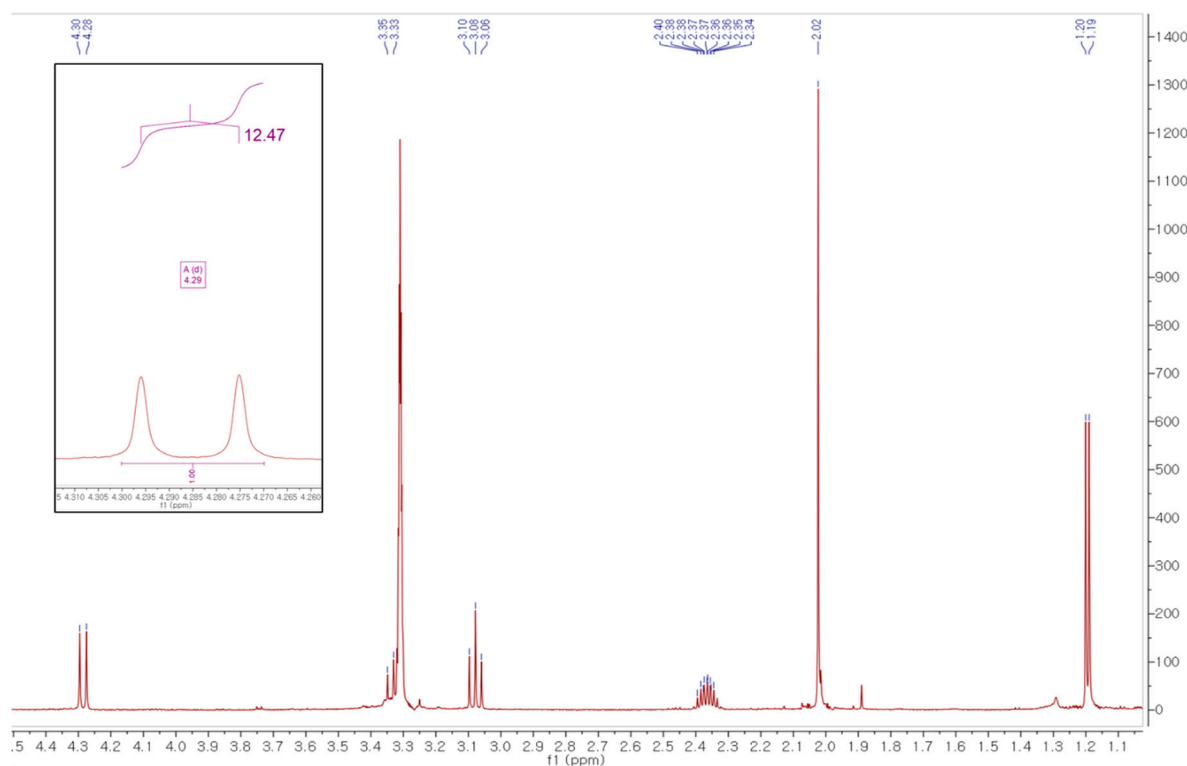

Figure S8.  $^1\text{H}$  NMR spectrum of **2** in  $\text{CD}_3\text{OD}$  (600 MHz).

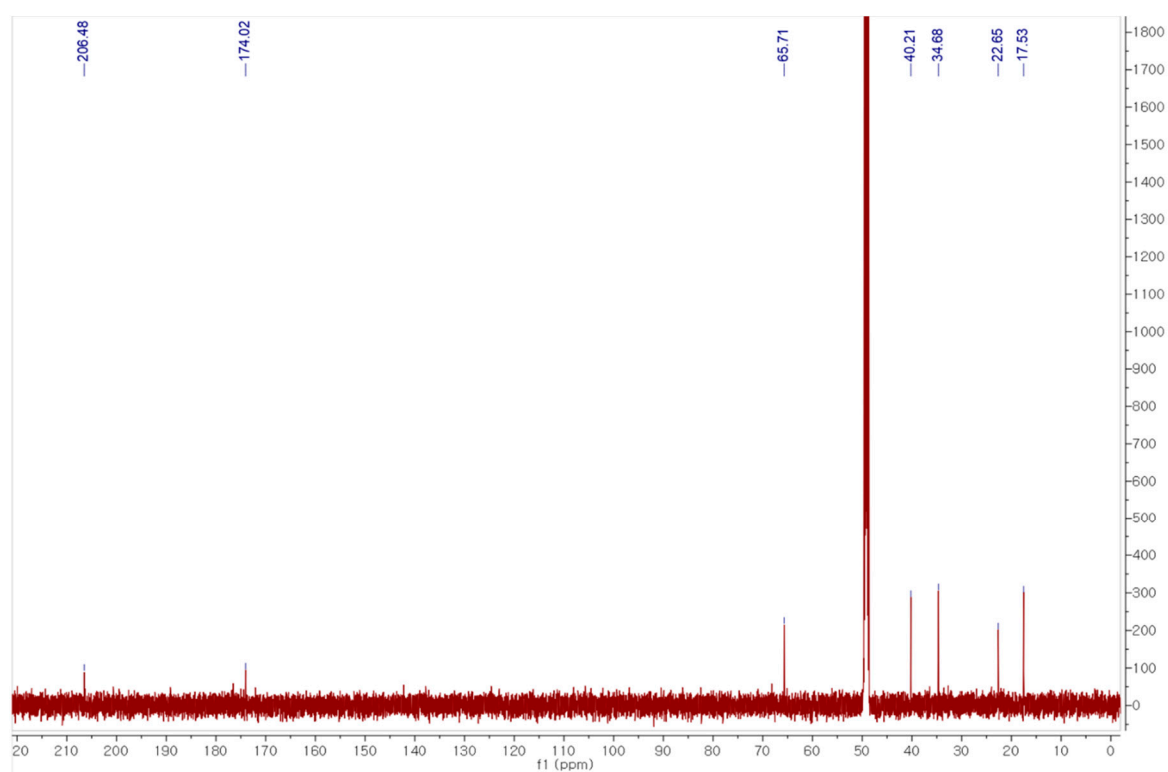

Figure S9.  $^{13}\text{C}$  NMR spectrum of **2** in  $\text{CD}_3\text{OD}$  (150 MHz).

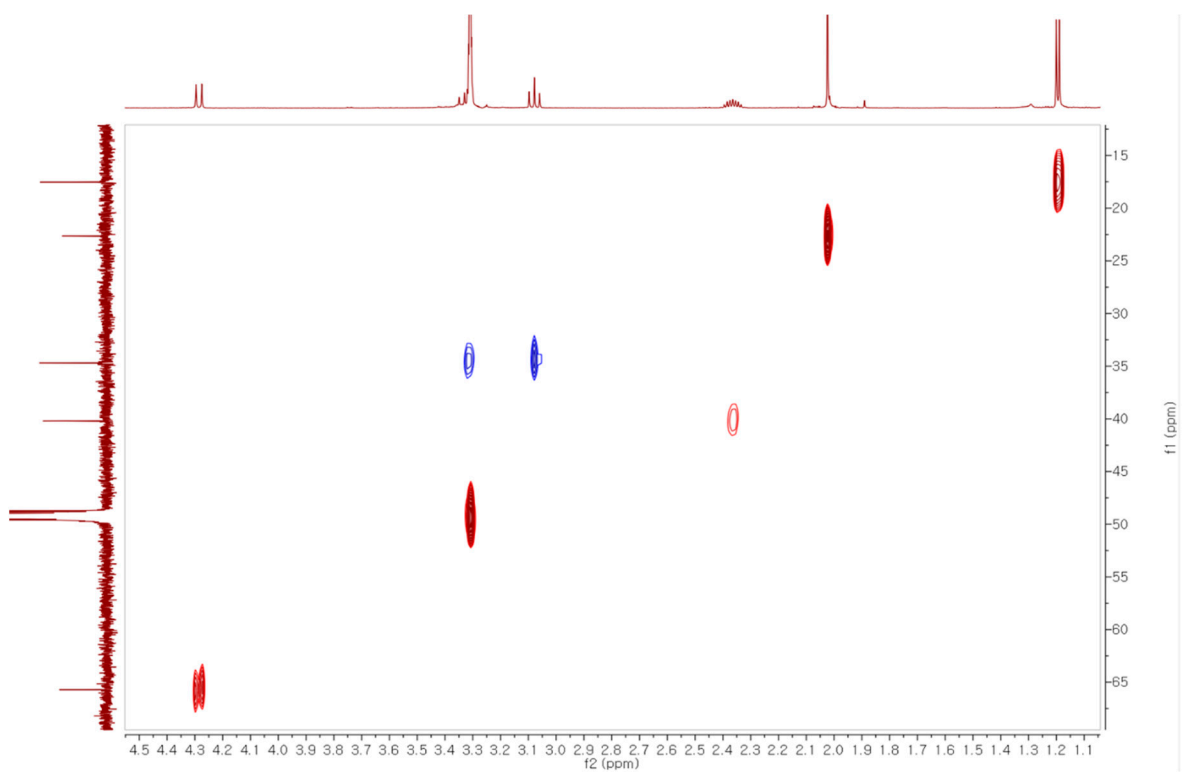

Figure S10. HSQC spectrum of **2** in CD<sub>3</sub>OD.

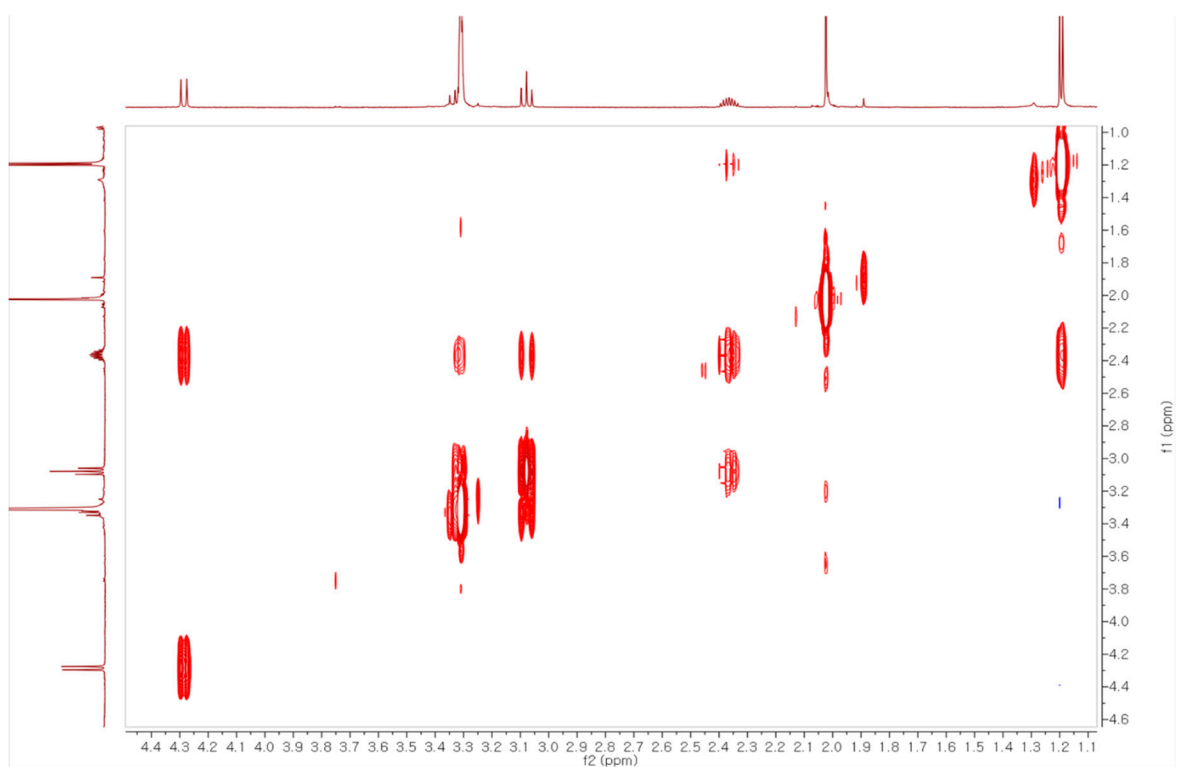

Figure S11. COSY spectrum of **2** in CD<sub>3</sub>OD.

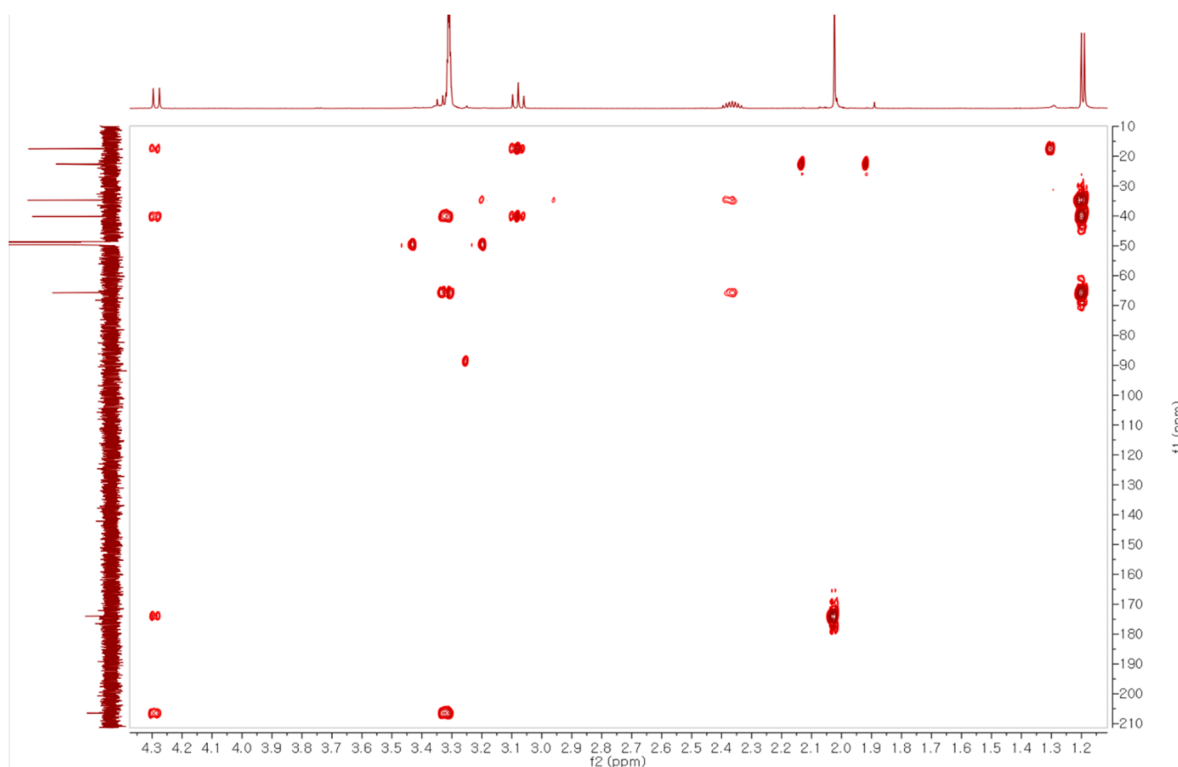

Figure S12. HMBC spectrum of **2** in  $\text{CD}_3\text{OD}$ .

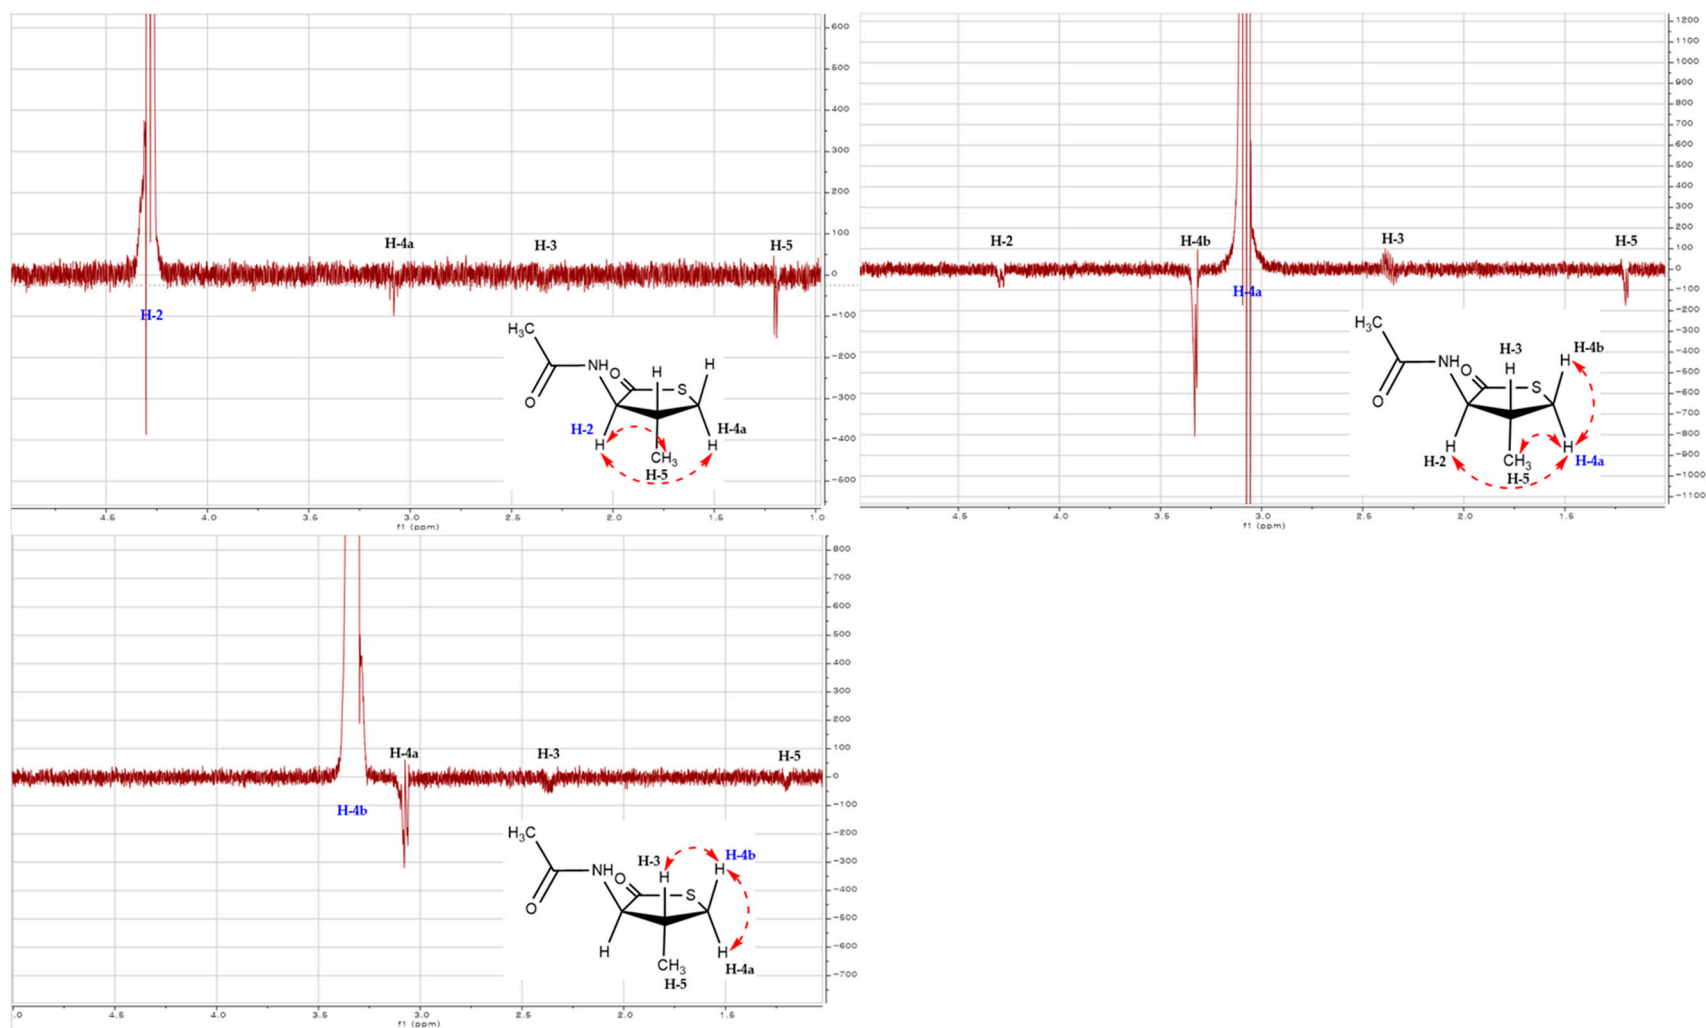

Figure S13. Selective 1D NOESY spectrum of **2** in CD<sub>3</sub>OD.

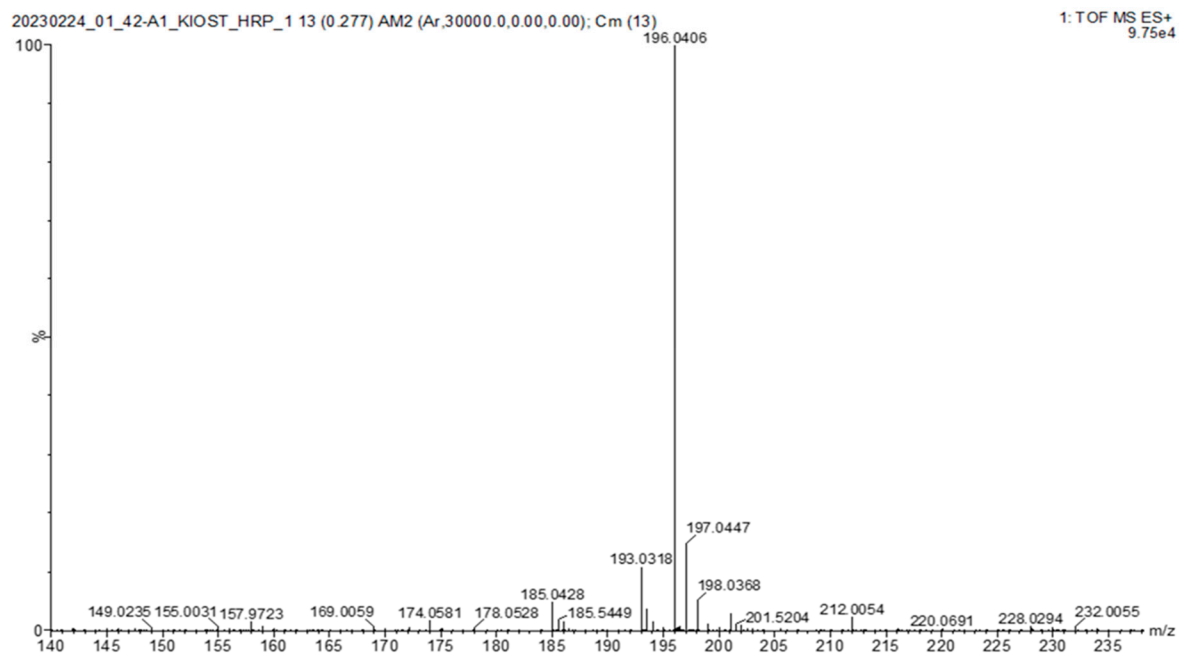

#### Elemental Composition Report

##### Single Mass Analysis

Tolerance = 5.0 PPM / DBE: min = -9.0, max = 100.0

Element prediction: Off

Number of isotope peaks used for i-FIT = 3

##### Monoisotopic Mass, Even Electron Ions

285 formula(e) evaluated with 2 results within limits (up to 50 closest results for each mass)

Elements Used:

C: 0-25 H: 0-100 N: 0-3 O: 0-4 Na: 0-1 S: 0-1

Minimum:

-9.0

Maximum:

5.0

5.0

100.0

Mass

Calc. Mass

mDa

PPM

DBE

i-FIT

Norm

Conf(%)

Formula

|          |          |      |      |      |       |       |       |                  |
|----------|----------|------|------|------|-------|-------|-------|------------------|
| 196.0406 | 196.0408 | -0.2 | -1.0 | 2.5  | 974.6 | 0.122 | 88.48 | C7 H11 N O2 Na S |
|          | 196.0399 | 0.7  | 3.6  | 10.5 | 976.7 | 2.161 | 11.52 | C12 H6 N O2      |

Figure S14. HR-ESIMS spectrum of **2**.

Table S1.  $^1\text{H}$  and  $^{13}\text{C}$  NMR data of **1**, **2**, and the reported compound in  $\text{CDCl}_3$

| Position      | <b>1</b>                   |                               | <b>2</b>                   |                               | Reported compound*         |                               |
|---------------|----------------------------|-------------------------------|----------------------------|-------------------------------|----------------------------|-------------------------------|
|               | $\delta_{\text{C}}$ , type | $\delta_{\text{H}}$ (J in Hz) | $\delta_{\text{C}}$ , type | $\delta_{\text{H}}$ (J in Hz) | $\delta_{\text{C}}$ , type | $\delta_{\text{H}}$ (J in Hz) |
| <b>1</b>      | 205.3, C                   |                               | 204.9, C                   |                               | 204.9, C                   |                               |
| <b>2</b>      | 63.9, CH                   | 4.57, ddd (6.7, 5.4, 1.4)     | 64.4, CH                   | 4.45, dd (12.5, 8.6)          | 64.4, CH                   | 4.45, d (12.5, 8.7)           |
| <b>3</b>      | 34.5, CH                   | 3.20, m                       | 40.5, CH                   | 2.24, m                       | 40.5, CH                   | 2.37, m                       |
| <b>4a</b>     |                            | 3.05, d (11.5)                |                            | 3.02, t (11.2)                |                            | 3.02, t                       |
| <b>4b</b>     | 35.2, $\text{CH}_2$        | 3.61, dd (11.5, 5.2)          | 34.0, $\text{CH}_2$        | 3.24, dd (11.2, 6.2)          | 34.0, $\text{CH}_2$        | 3.24, dd (11.2, 6.2)          |
| <b>5</b>      | 12.2, $\text{CH}_3$        | 0.97, d (7.0)                 | 17.5, $\text{CH}_3$        | 1.25, d (6.6)                 | 17.5, $\text{CH}_3$        | 1.25, d (6.5)                 |
| <b>6, -NH</b> |                            | 5.94, s                       |                            | 5.66, d (8.6)                 |                            | 5.67, s                       |
| <b>7</b>      | 170.6, C                   |                               | 170.9, C                   |                               | 170.9, C                   |                               |
| <b>8</b>      | 23.1, $\text{CH}_3$        | 2.07, s                       | 23.4, $\text{CH}_3$        | 2.09, s                       | 23.4, $\text{CH}_3$        | 2.08, s                       |

\* *Nat. Prod. Res.* 2020, 34, 2926-2930.

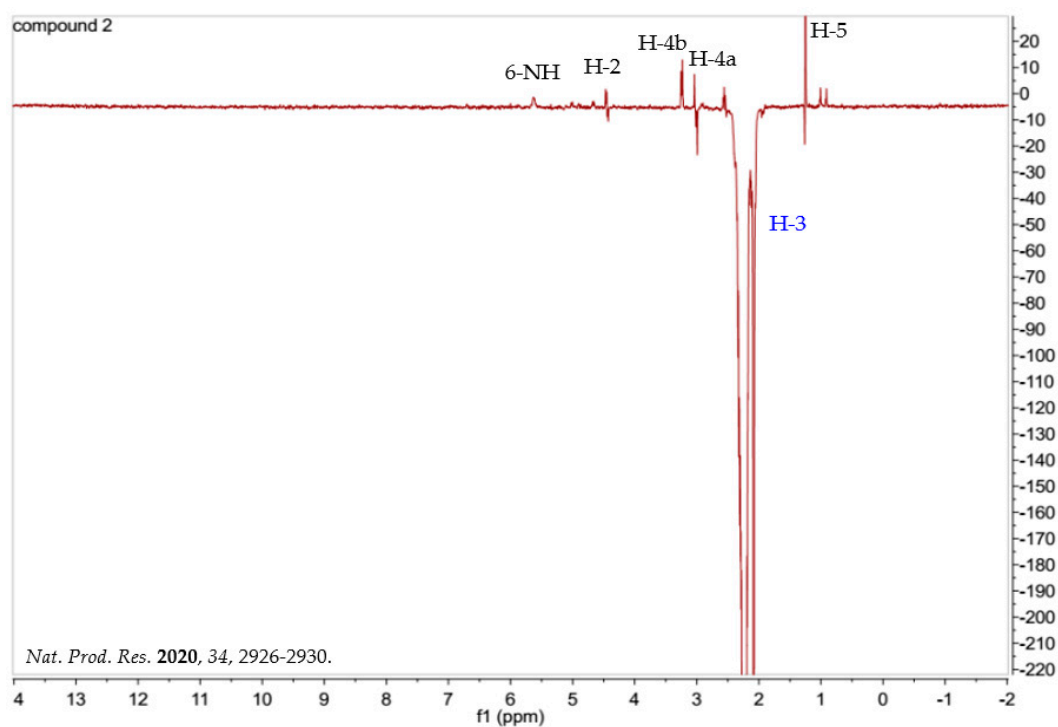

Figure S15. 1D NOESY spectrum of the reported compound.

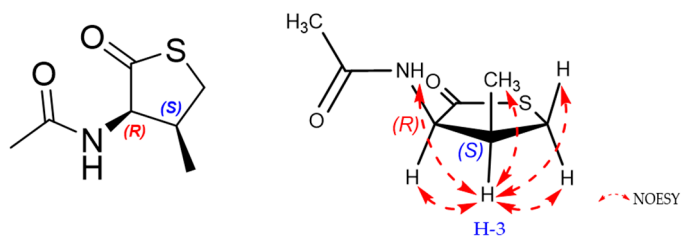

Figure S16. 1D NOESY correlations of the reported compound.

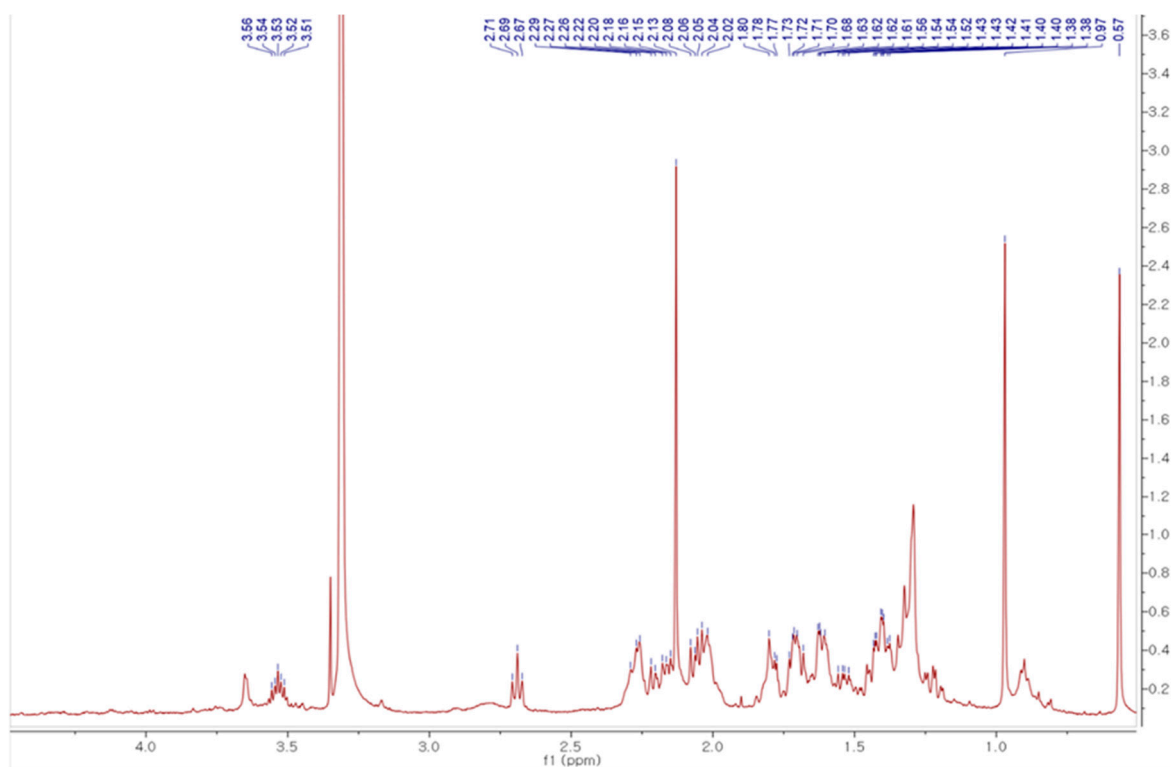

Figure S17.  $^1\text{H}$  NMR spectrum of **3** in  $\text{CD}_3\text{OD}$  (600 MHz).

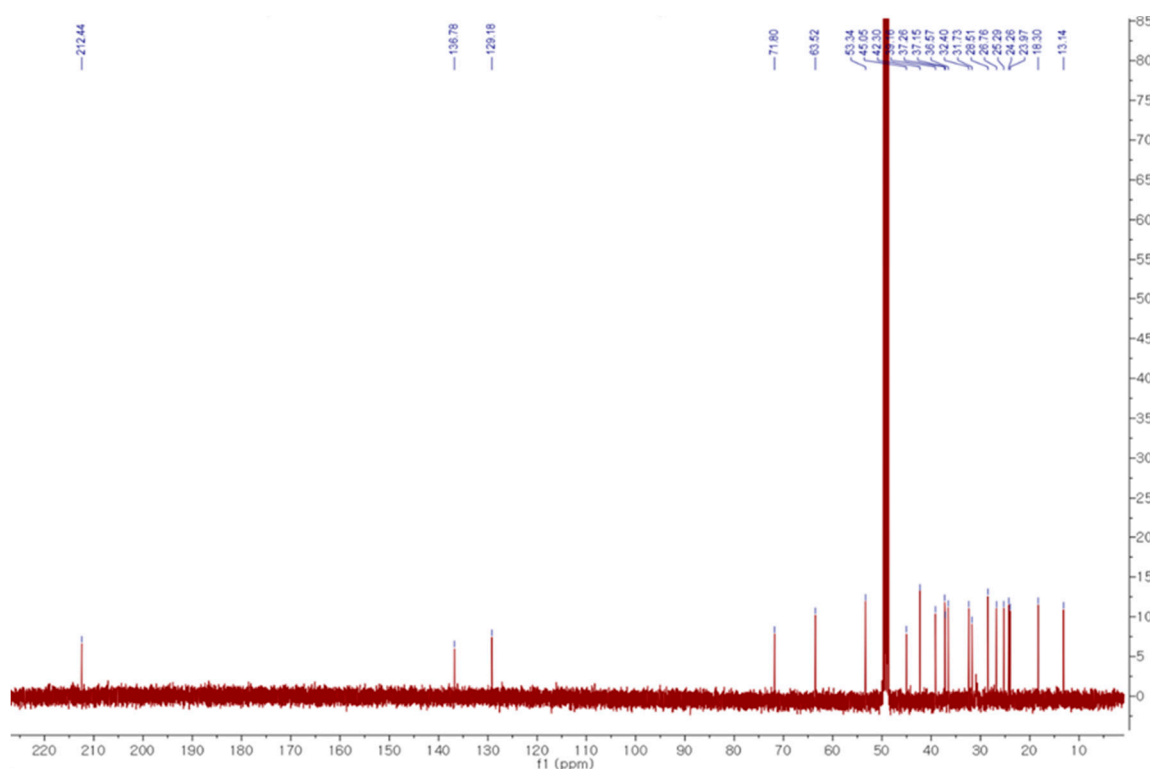

Figure S18.  $^{13}\text{C}$  NMR spectrum of **3** in  $\text{CD}_3\text{OD}$  (150 MHz).

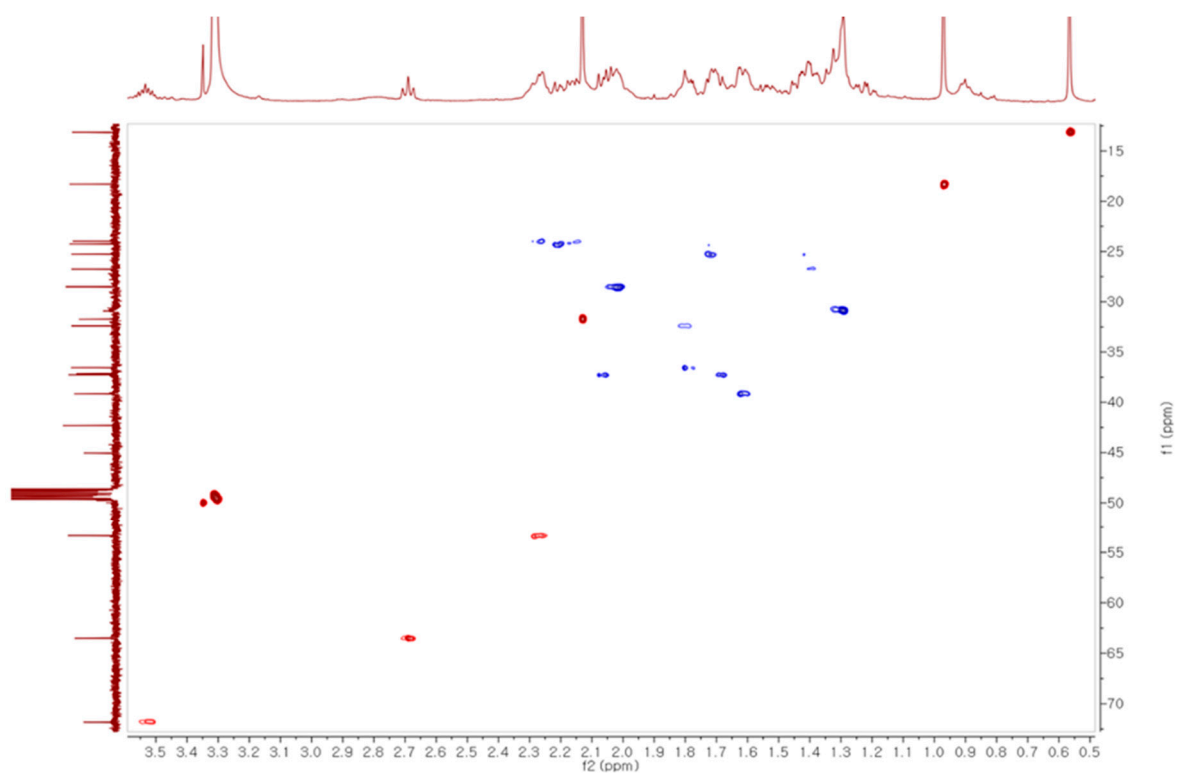

Figure S19. HSQC spectrum of **3** in CD<sub>3</sub>OD.



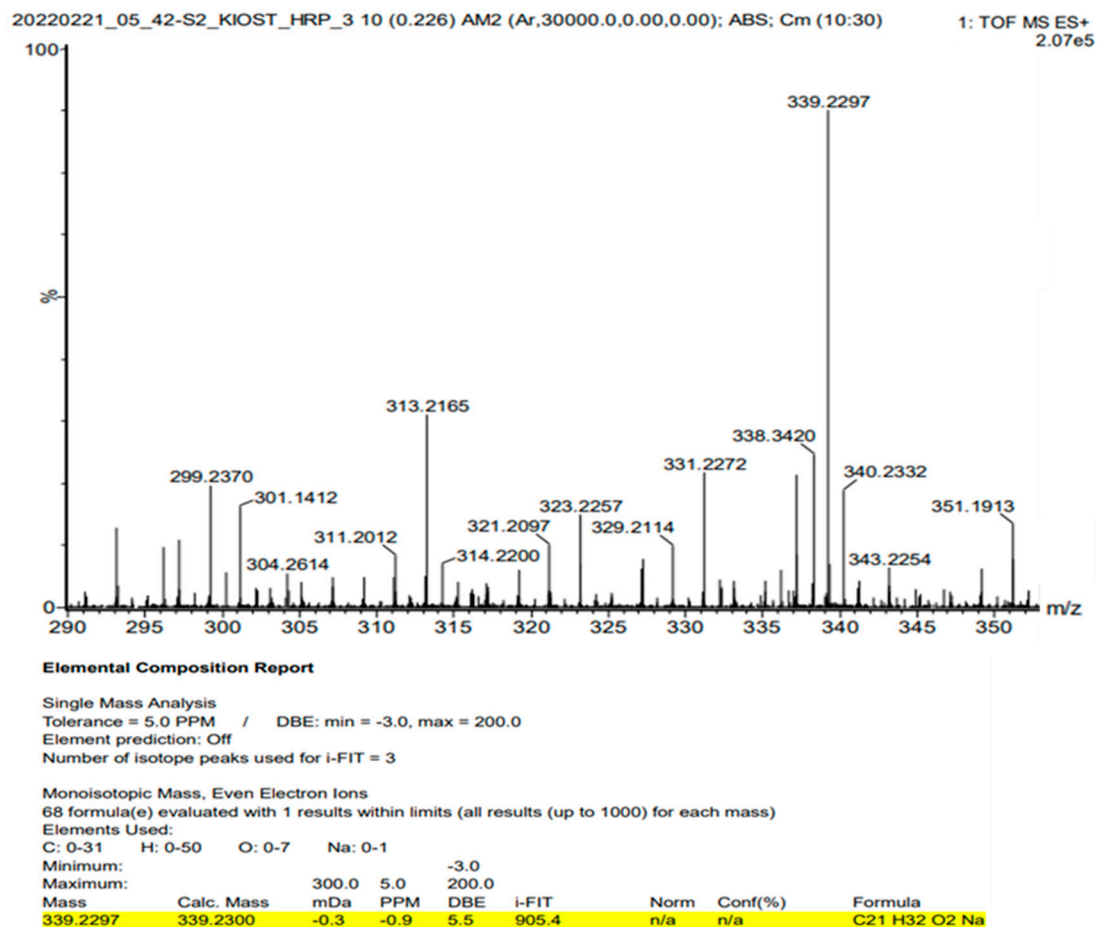

Figure S20. HR-ESIMS spectrum of **3**.

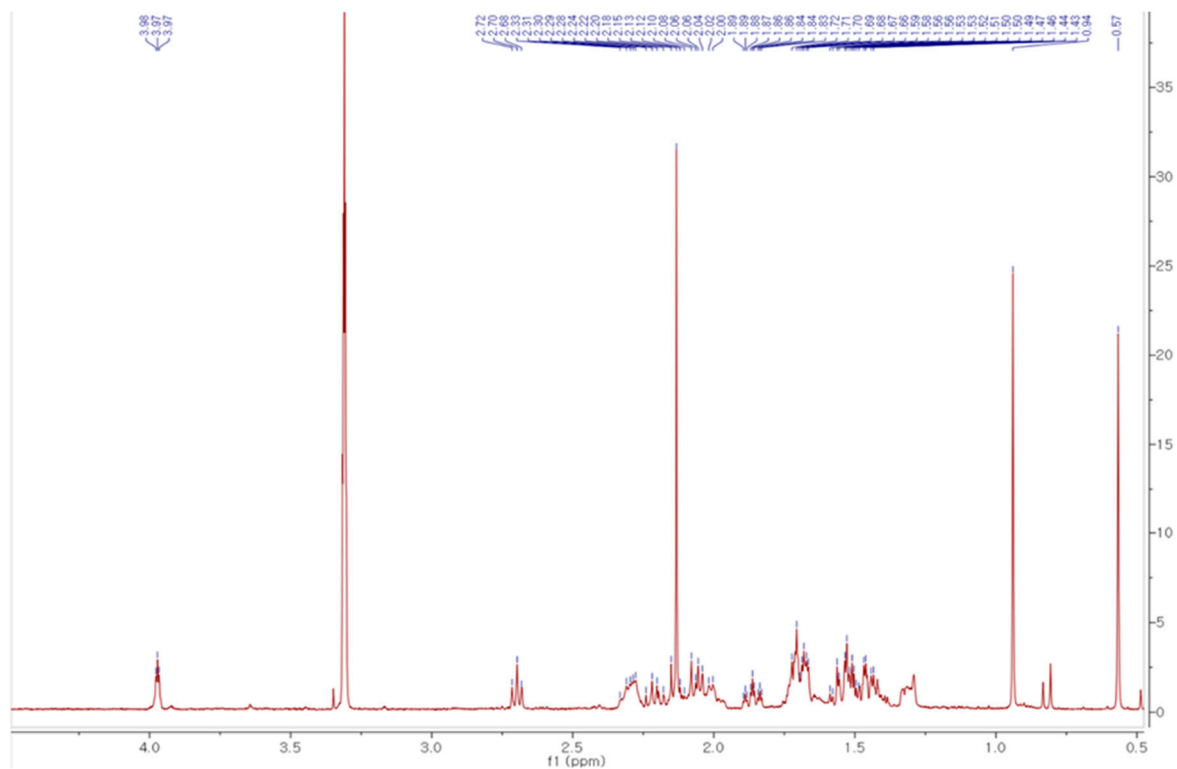

Figure S21.  $^1\text{H}$  NMR spectrum of **4** in  $\text{CD}_3\text{OD}$  (600 MHz).

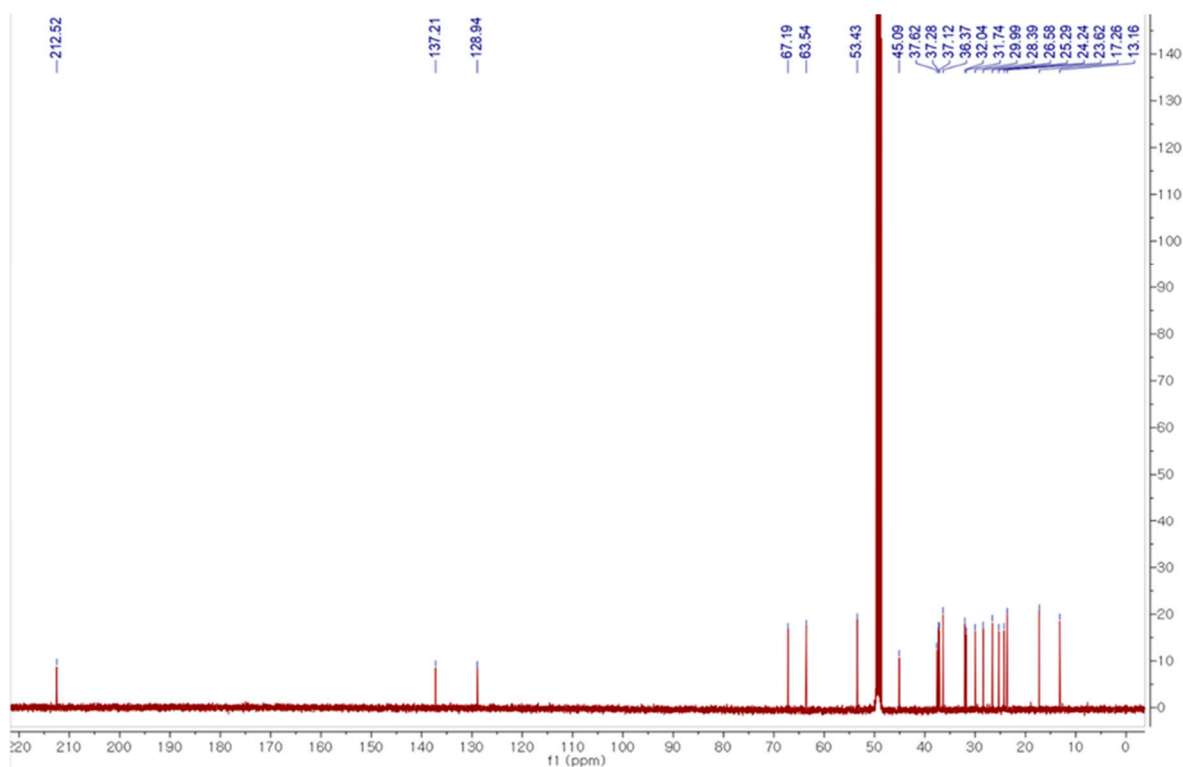

Figure S22.  $^{13}\text{C}$  NMR spectrum of **4** in  $\text{CD}_3\text{OD}$  (150 MHz).

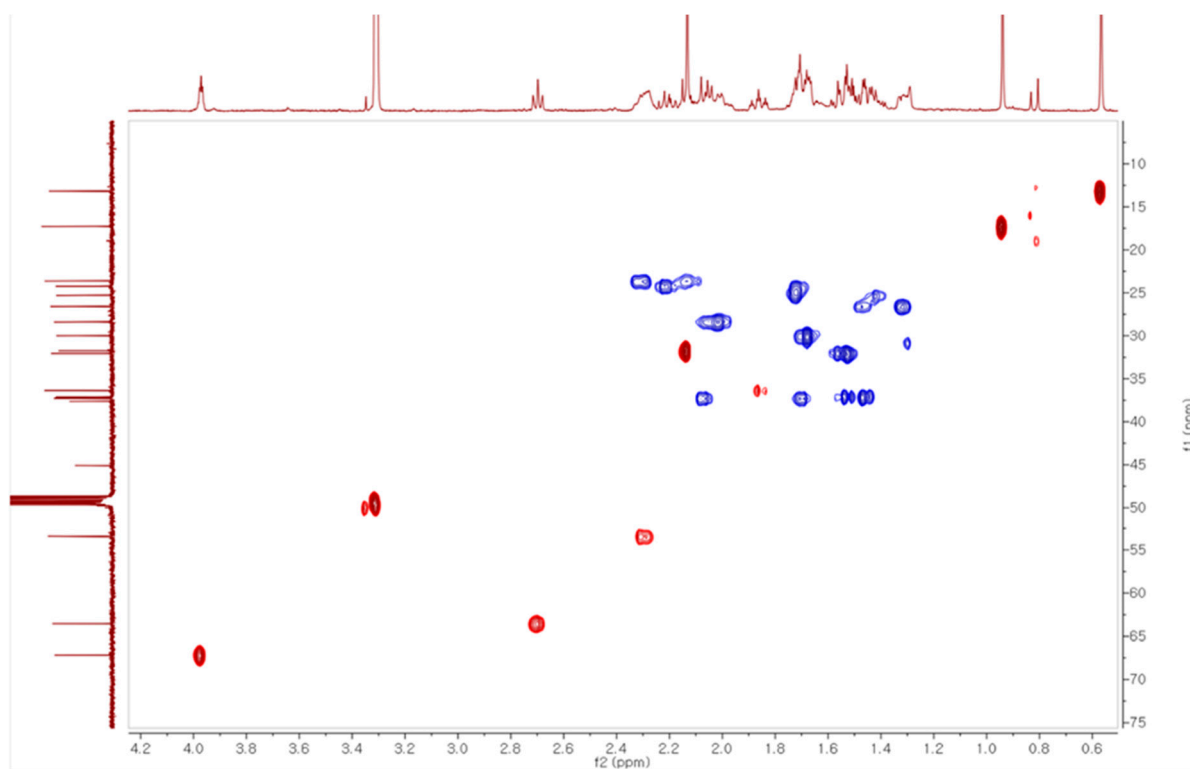

Figure S23. HSQC spectrum of **4** in CD<sub>3</sub>OD.

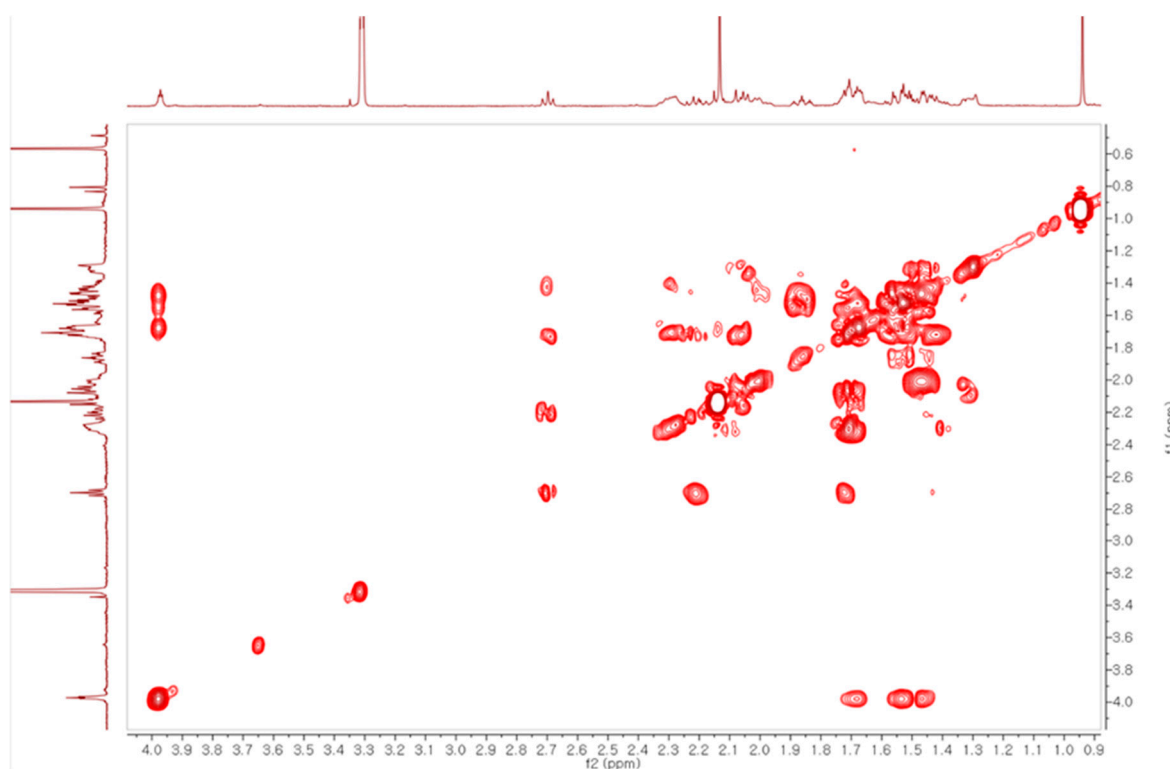

Figure S24. COSY spectrum of **4** in CD<sub>3</sub>OD.

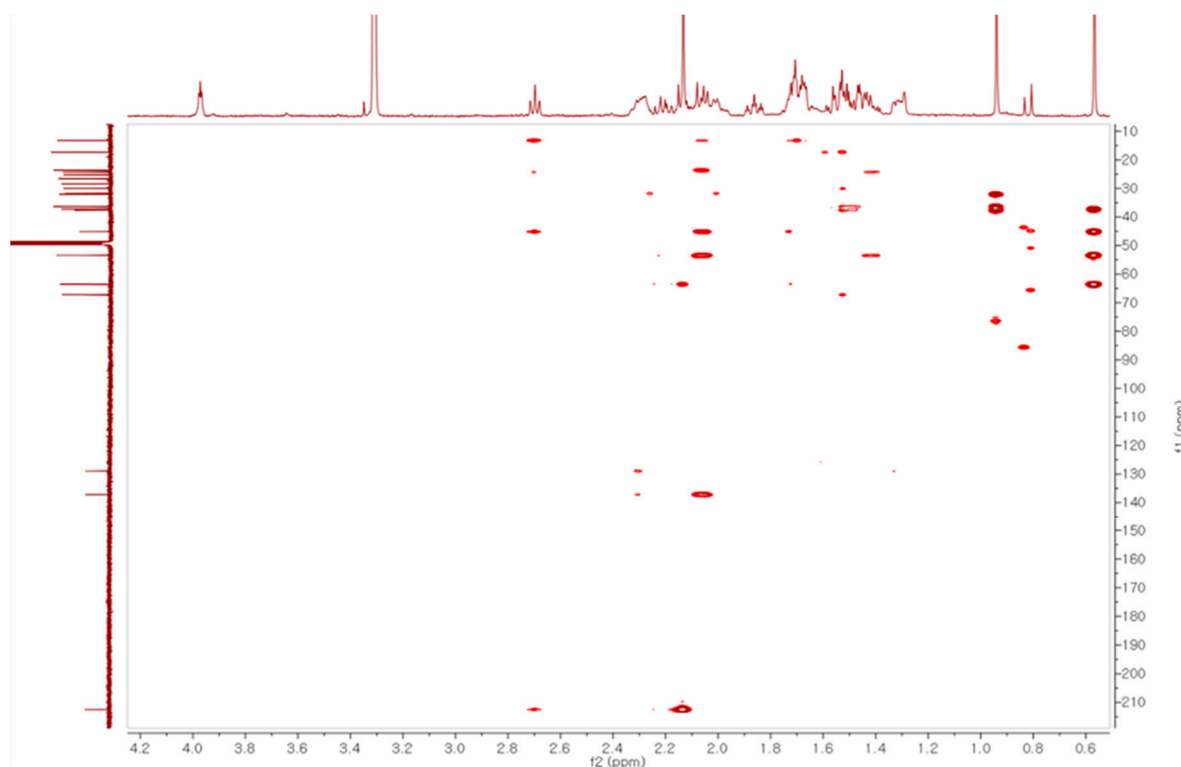

Figure S25. HMBC spectrum of **4** in CD<sub>3</sub>OD.

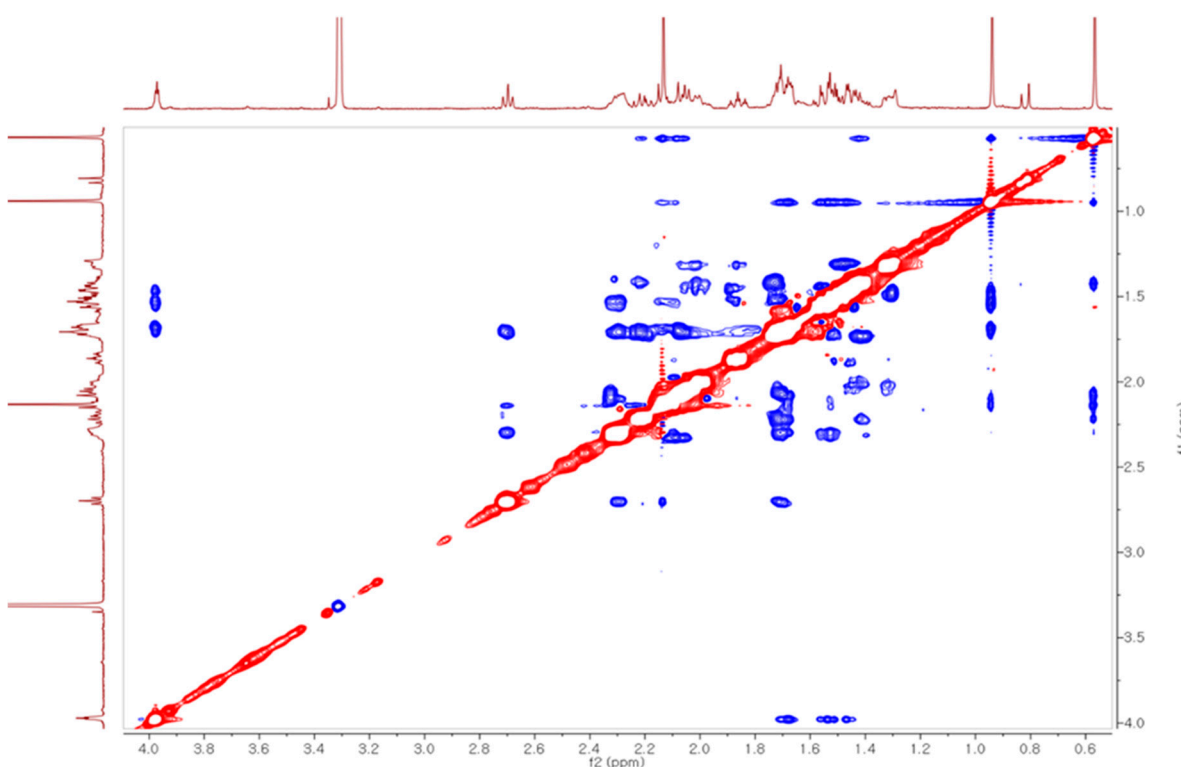

Figure S26. ROESY spectrum of **4** in CD<sub>3</sub>OD.

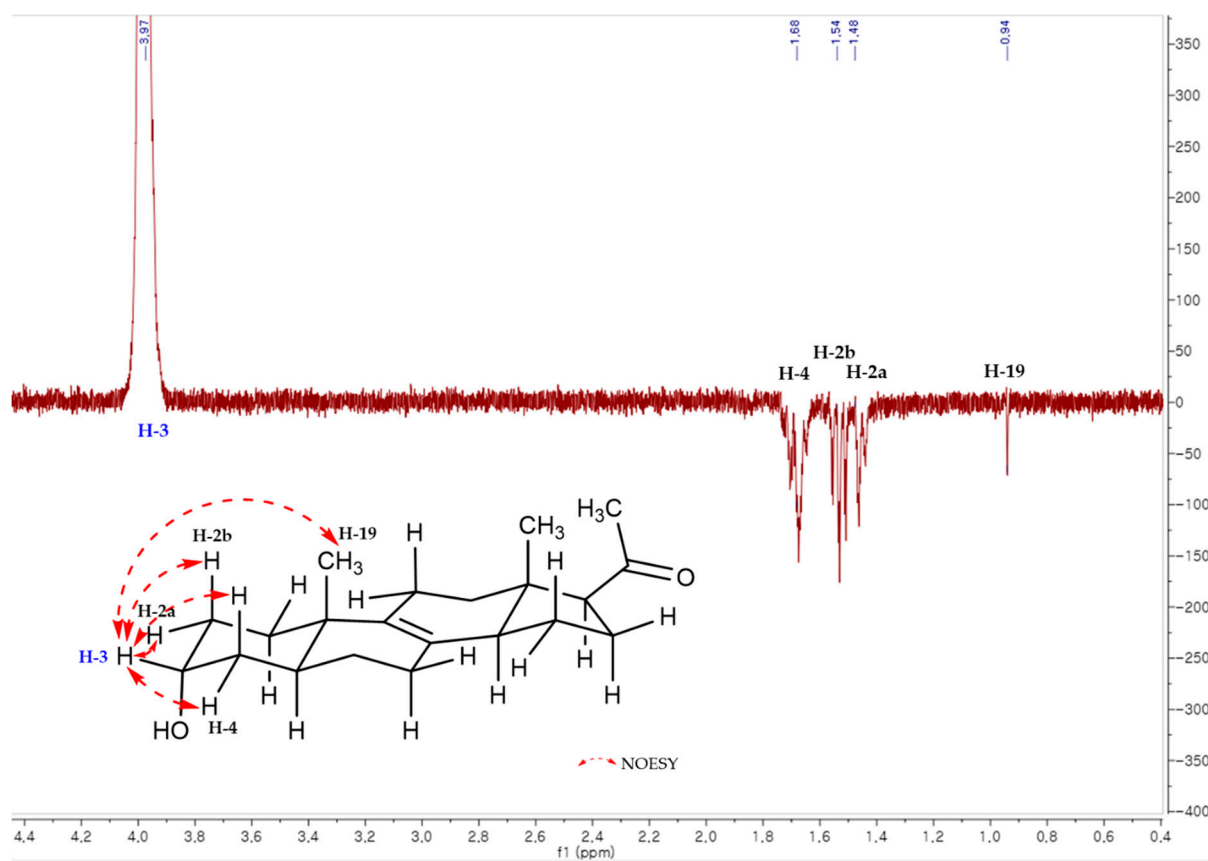

Figure S27. Selective 1D NOESY spectrum of **4** in CD<sub>3</sub>OD.

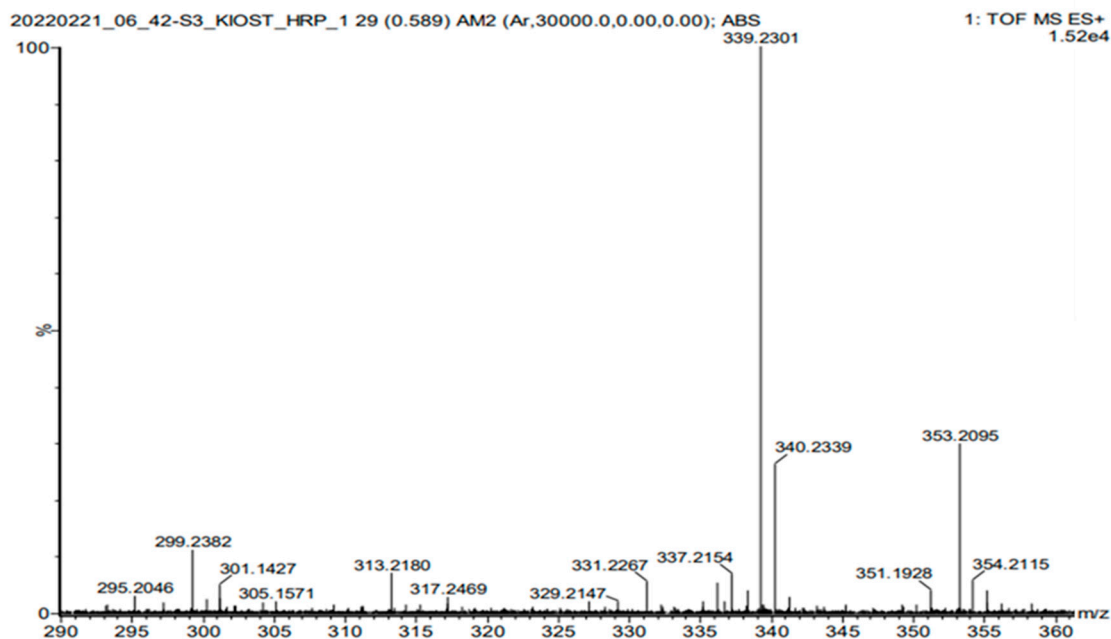

#### Elemental Composition Report

Single Mass Analysis  
Tolerance = 5.0 PPM / DBE: min = -3.0, max = 200.0  
Element prediction: Off  
Number of isotope peaks used for i-FIT = 3

Monoisotopic Mass, Even Electron Ions  
68 formula(e) evaluated with 1 results within limits (all results (up to 1000) for each mass)  
Elements Used:

C: 0-31 H: 0-50 O: 0-7 Na: 0-1

Minimum: -3.0  
Maximum: 200.0

| Mass     | Calc. Mass | mDa | PPM | DBE | i-FIT | Norm | Conf(%) | Formula                                           |
|----------|------------|-----|-----|-----|-------|------|---------|---------------------------------------------------|
| 339.2301 | 339.2300   | 0.1 | 0.3 | 5.5 | 562.8 | n/a  | n/a     | C <sub>21</sub> H <sub>32</sub> O <sub>2</sub> Na |

Figure S28. HR-ESIMS spectrum of 4.

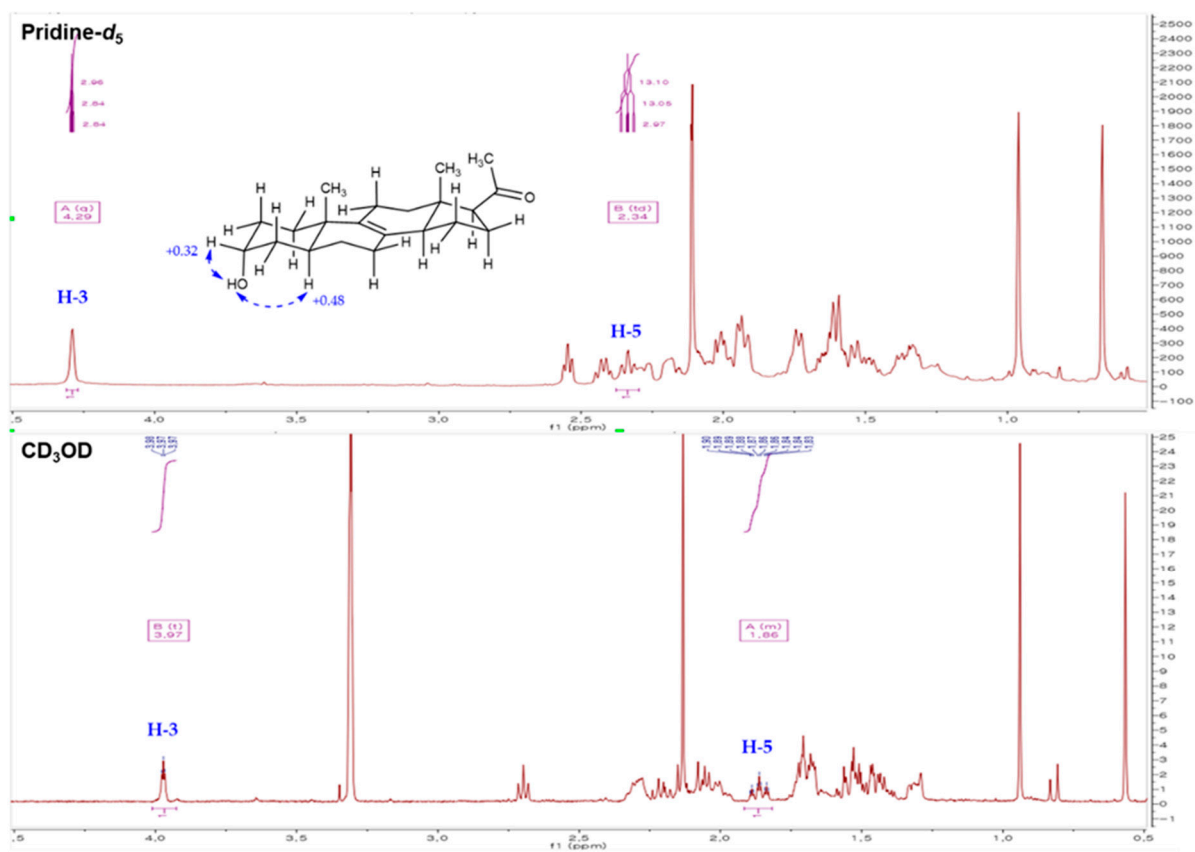

Figure S29. Comparison of  $^1\text{H}$  NMR spectra of **4** in pyridine- $d_5$  and in  $\text{CD}_3\text{OD}$ .

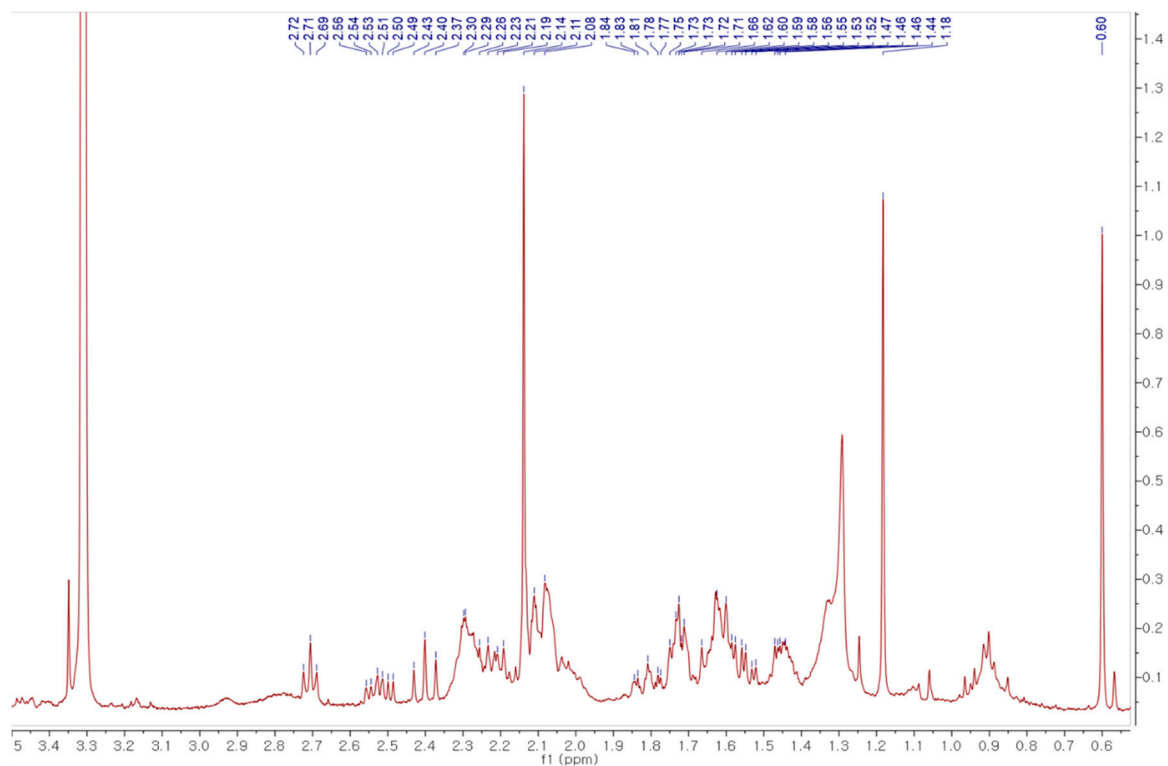

Figure S30.  $^1\text{H}$  NMR spectrum of **5** in  $\text{CD}_3\text{OD}$  (600 MHz)

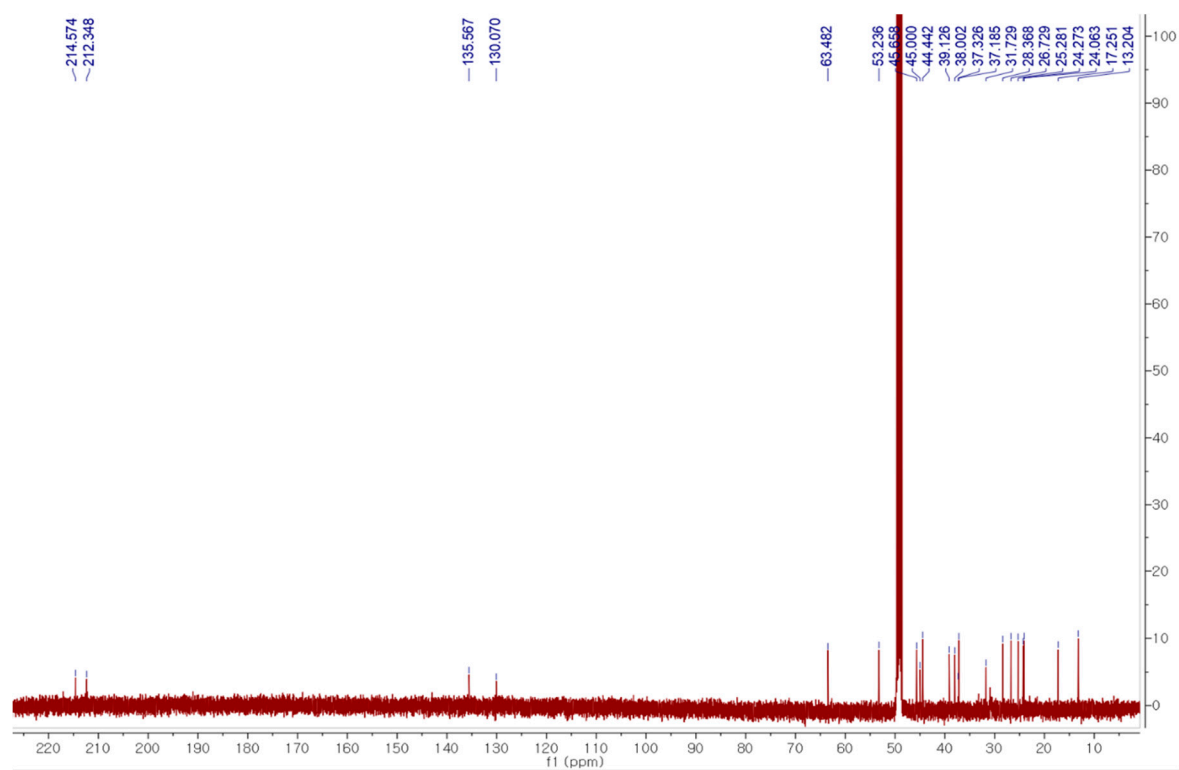

Figure S31.  $^{13}\text{C}$  NMR spectrum of **5** in  $\text{CD}_3\text{OD}$  (150 MHz).



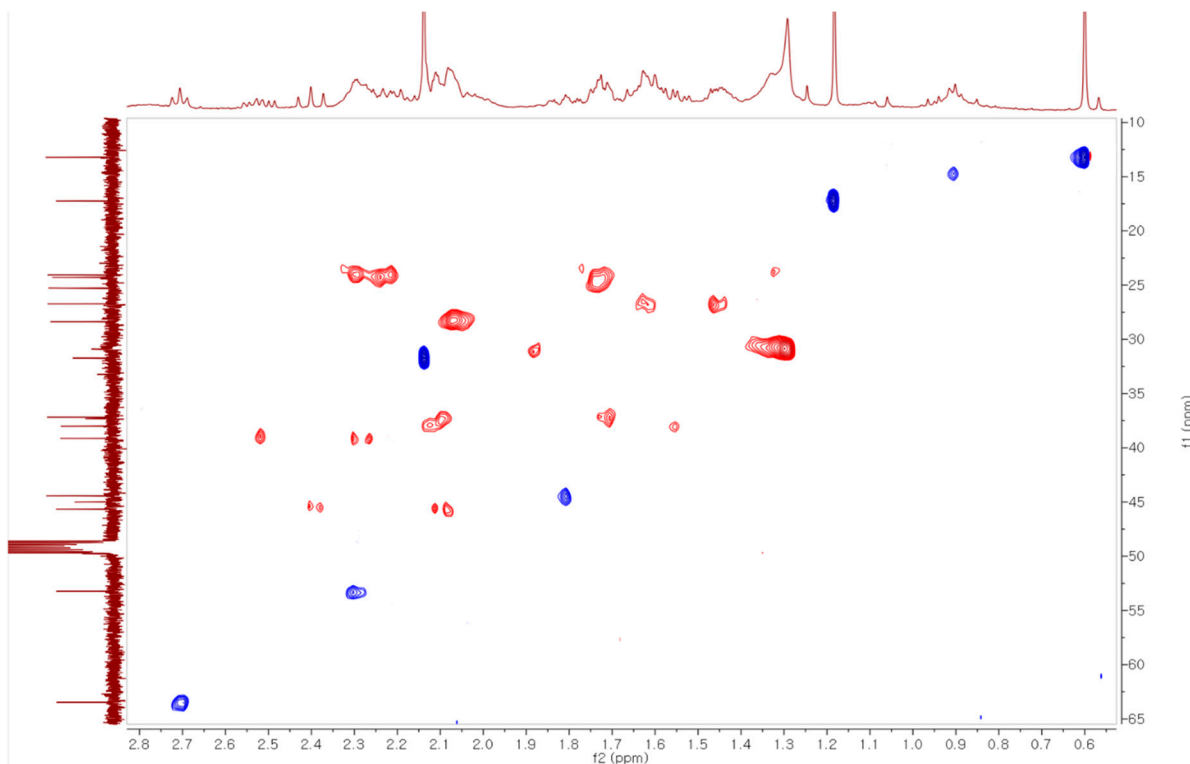

Figure S32. HSQC spectrum of **5** in CD<sub>3</sub>OD.

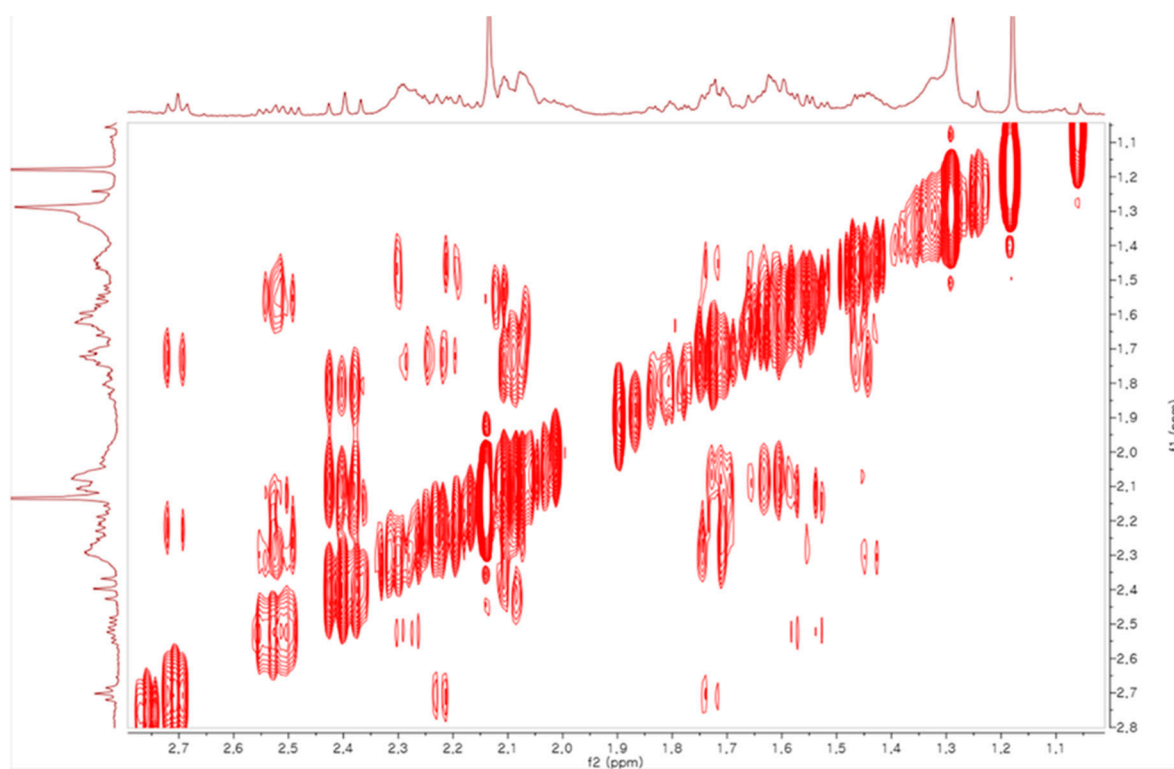

Figure S33. COSY spectrum of **5** in CD<sub>3</sub>OD.

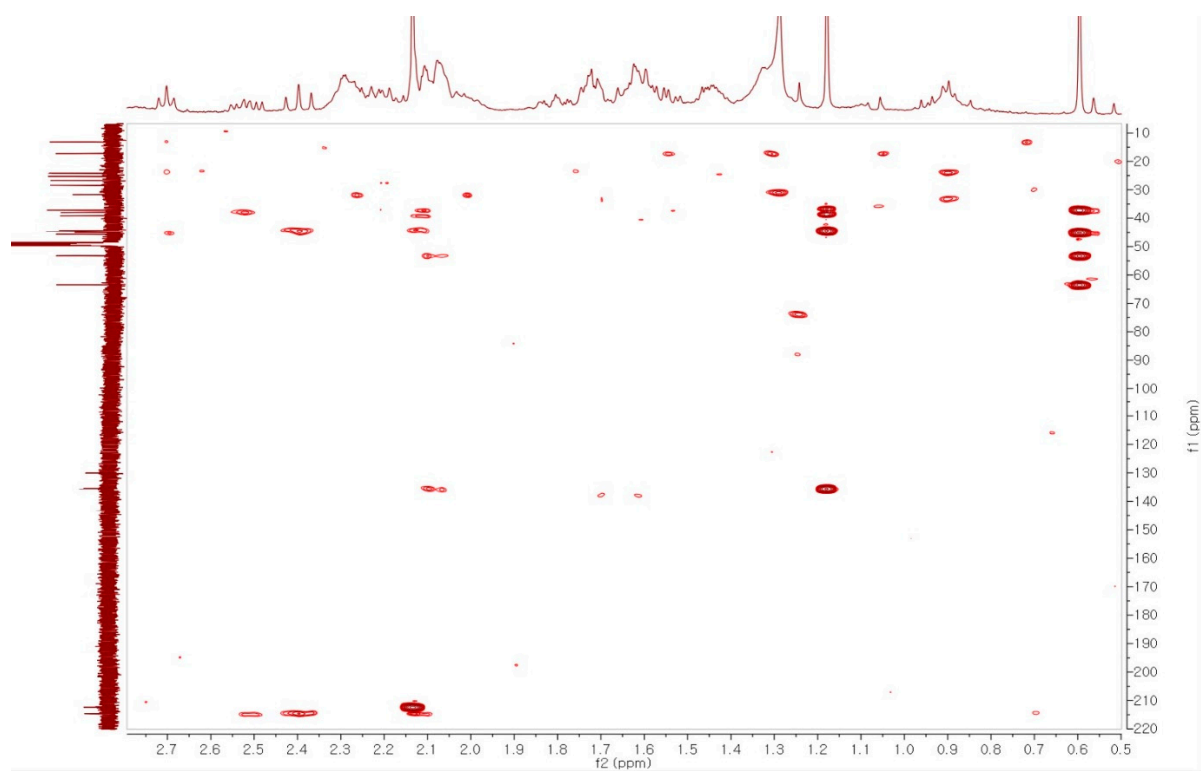

Figure S34. HMBC spectrum of **5** in CD<sub>3</sub>OD.

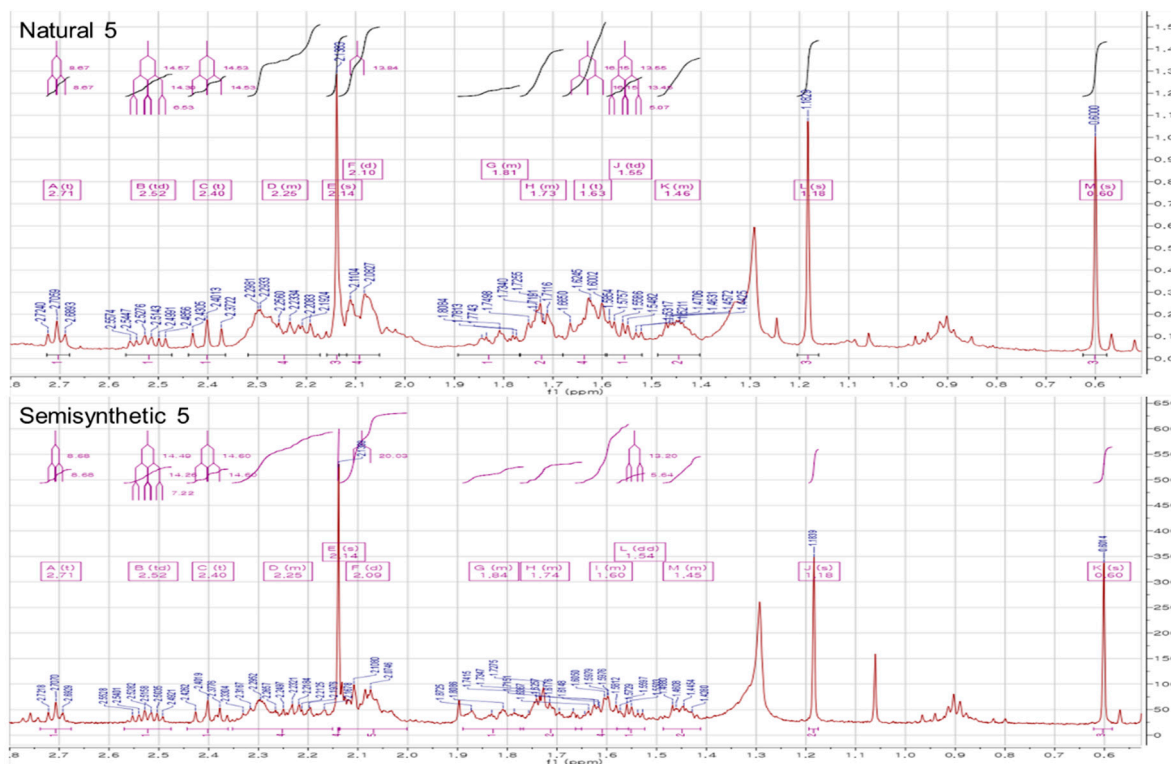

Figure S35. Comparison of  $^1\text{H}$  NMR spectra between natural **5** and semisynthetic **5** in  $\text{CD}_3\text{OD}$  (600 MHz).

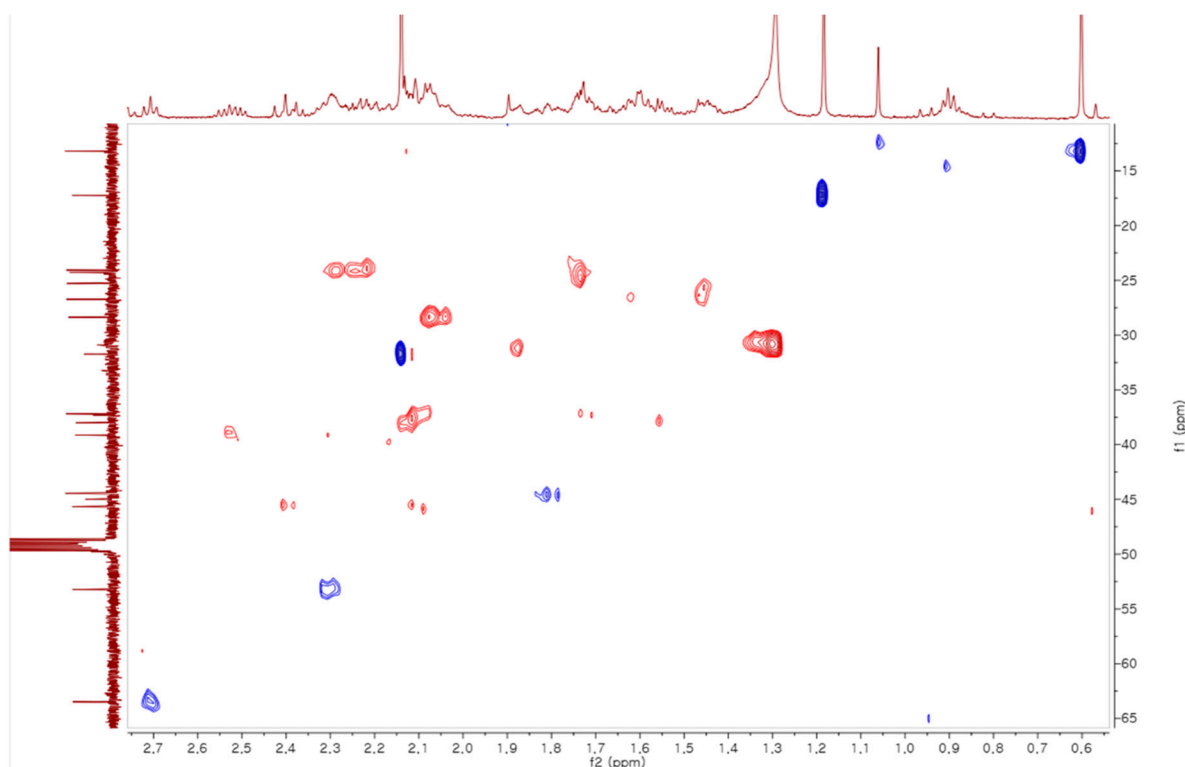

Figure S36. HSQC spectrum of semisynthetic **5** in CD<sub>3</sub>OD.

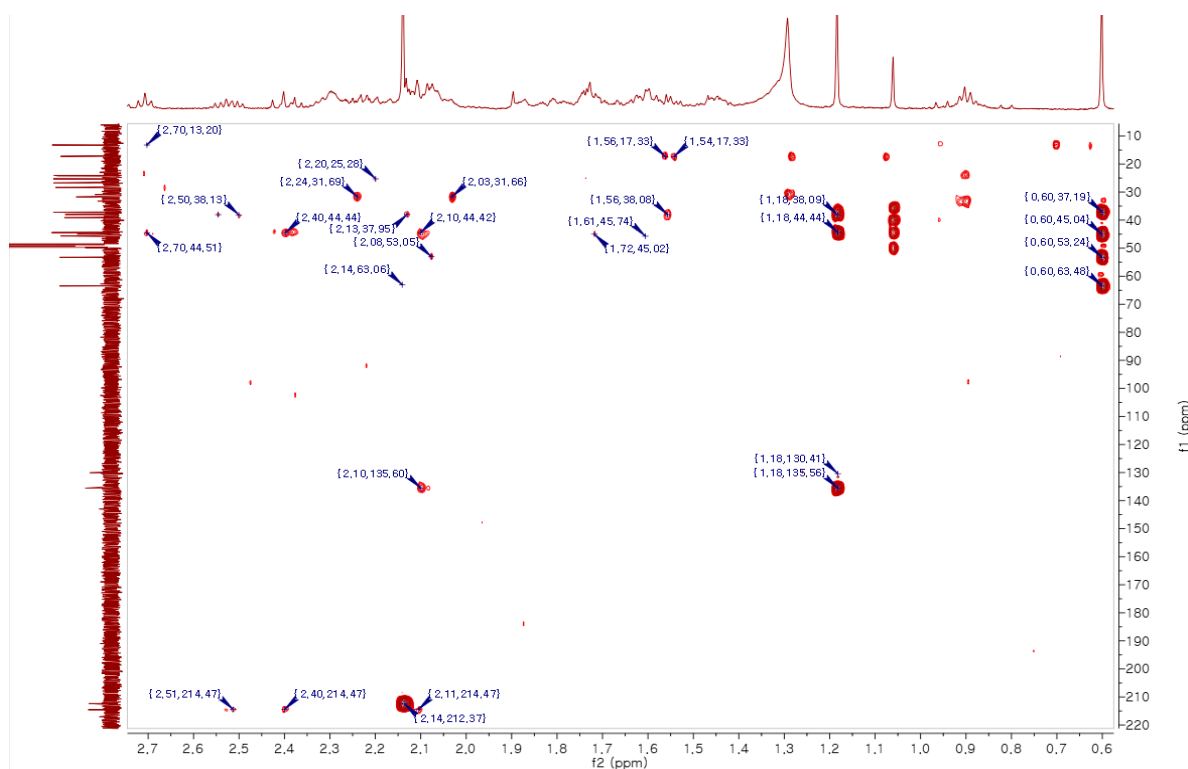

Figure S37. HMBC spectrum of semisynthetic **5** in CD<sub>3</sub>OD.

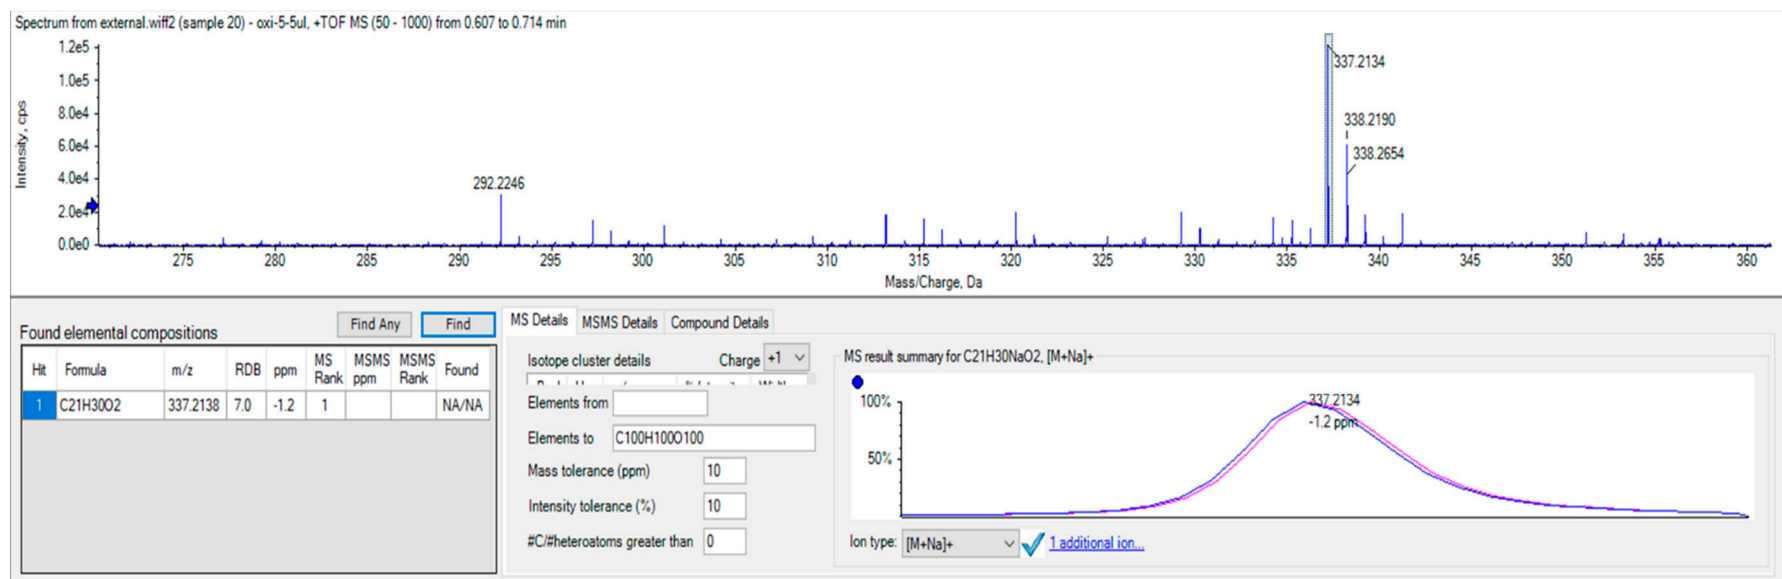

Figure S38. HR-ESIMS spectrum of semisynthetic 5.
